# Supplementary material for: Opportunities to sustain a multi-country quality of care network: Lessons on the actions of four countries Bangladesh, Ethiopia, Malawi, and Uganda
Source: PubMed Central journal article supplement (PMC10497147; doi:10.1371/journal.pgph.0001672), 2023-09-12
Supplement: pgph.0001672.s005.pdf [file pgph.0001672.s005.pdf]

# PLOS Global Public Health

## Opportunities to sustain a multi-country quality of care network: lessons on the actions of four countries Bangladesh, Ethiopia, Malawi, and Uganda --Manuscript Draft--

|                              |                                                                                                                                                                                                                                                                                                                                                                                                                                                                                                                                                                                                                                                                                                                                                                                                                                                                                                                                                                                                                                                                                                                                                                                                                                                                                                             |
|------------------------------|-------------------------------------------------------------------------------------------------------------------------------------------------------------------------------------------------------------------------------------------------------------------------------------------------------------------------------------------------------------------------------------------------------------------------------------------------------------------------------------------------------------------------------------------------------------------------------------------------------------------------------------------------------------------------------------------------------------------------------------------------------------------------------------------------------------------------------------------------------------------------------------------------------------------------------------------------------------------------------------------------------------------------------------------------------------------------------------------------------------------------------------------------------------------------------------------------------------------------------------------------------------------------------------------------------------|
| <b>Manuscript Number:</b>    | PGPH-D-22-01888R1                                                                                                                                                                                                                                                                                                                                                                                                                                                                                                                                                                                                                                                                                                                                                                                                                                                                                                                                                                                                                                                                                                                                                                                                                                                                                           |
| <b>Article Type:</b>         | Research Article                                                                                                                                                                                                                                                                                                                                                                                                                                                                                                                                                                                                                                                                                                                                                                                                                                                                                                                                                                                                                                                                                                                                                                                                                                                                                            |
| <b>Full Title:</b>           | Opportunities to sustain a multi-country quality of care network: lessons on the actions of four countries Bangladesh, Ethiopia, Malawi, and Uganda                                                                                                                                                                                                                                                                                                                                                                                                                                                                                                                                                                                                                                                                                                                                                                                                                                                                                                                                                                                                                                                                                                                                                         |
| <b>Short Title:</b>          | Opportunities to sustain a multi-country quality of care network                                                                                                                                                                                                                                                                                                                                                                                                                                                                                                                                                                                                                                                                                                                                                                                                                                                                                                                                                                                                                                                                                                                                                                                                                                            |
| <b>Corresponding Author:</b> | Seblewengel Lemma Abreham, PhD, MPH<br>London School Of Hygiene and Tropical Medicine Department of Disease Control<br>Addis Ababa, ETHIOPIA                                                                                                                                                                                                                                                                                                                                                                                                                                                                                                                                                                                                                                                                                                                                                                                                                                                                                                                                                                                                                                                                                                                                                                |
| <b>Order of Authors:</b>     | Seblewengel Lemma Abreham, PhD, MPH<br>Callie Daniels-Howell<br>Asebe Amenu Tufa, PhD<br>Mithun Sarker<br>Kohenour Akter<br>Catherine Nakidde<br>Gloria Seruwagi<br>Albert Dube<br>Kondwani Mwandira<br>The QCN Evaluation group<br>Desalegn Bekele Taye<br>Mike English<br>Yusra Ribhi Shawar, PhD, MPH<br>Kasonde Mwaba<br>Nehla Djellouli<br>Tim Colbourn<br>Tanya Marchant                                                                                                                                                                                                                                                                                                                                                                                                                                                                                                                                                                                                                                                                                                                                                                                                                                                                                                                              |
| <b>Keywords:</b>             | government ownership; institutionalization; community engagement; adoption; financial sustainability; quality of care; Network; Maternal and newborn health; Bangladesh; Ethiopia; Malawi; Uganda                                                                                                                                                                                                                                                                                                                                                                                                                                                                                                                                                                                                                                                                                                                                                                                                                                                                                                                                                                                                                                                                                                           |
| <b>Abstract:</b>             | The Quality of Care Network (QCN) is a global initiative that was established in 2017 under the leadership of WHO in 11 low-and- middle income countries to improve maternal, newborn, and child health. The vision was that the Quality of Care Network would be embedded within member countries and continued beyond the initial implementation period: that the Network would be sustained. This paper investigated the experience of actions taken to sustain QCN in four Network countries (Bangladesh, Ethiopia, Malawi, and Uganda) and reports on lessons learned. Multiple iterative rounds of data collection were conducted through qualitative interviews with global and national stakeholders, and non-participatory observation of health facilities and meetings. A total of 241 interviews, 42 facility and four meeting observations were carried out. We conducted a thematic analysis of all data using a framework approach that defined six critical actions that can be taken to promote sustainability. The analysis revealed that these critical actions were present with varying degrees in each of the four countries. Although vulnerabilities were observed, there was good evidence to support that actions were taken to institutionalize the innovation within the health |

|                                                                                                                                                                                                                                                                                                                                                                                                                                                                                                               |                                                                                                                                                                                                                                                                                                                                                                                                                                                                                                                                                                                                                                                                                                                                                                        |
|---------------------------------------------------------------------------------------------------------------------------------------------------------------------------------------------------------------------------------------------------------------------------------------------------------------------------------------------------------------------------------------------------------------------------------------------------------------------------------------------------------------|------------------------------------------------------------------------------------------------------------------------------------------------------------------------------------------------------------------------------------------------------------------------------------------------------------------------------------------------------------------------------------------------------------------------------------------------------------------------------------------------------------------------------------------------------------------------------------------------------------------------------------------------------------------------------------------------------------------------------------------------------------------------|
|                                                                                                                                                                                                                                                                                                                                                                                                                                                                                                               | <p>system, to motivate micro-level actors, plan opportunities for reflection and adaptation from the outset, and to support strong government ownership. Two actions were largely absent and weakened confidence in future sustainability: managing financial uncertainties and fostering community ownership.</p> <p>Evidence from four countries suggested that the QCN model would not be sustained in its original format, largely because of financial vulnerability and insufficient time to embed the innovation at the sub-national level. But especially the efforts made to institutionalize the innovation in existing systems meant that some characteristics of QCN may be carried forward within broader government quality improvement initiatives.</p> |
| <b>Additional Information:</b>                                                                                                                                                                                                                                                                                                                                                                                                                                                                                |                                                                                                                                                                                                                                                                                                                                                                                                                                                                                                                                                                                                                                                                                                                                                                        |
| <b>Question</b>                                                                                                                                                                                                                                                                                                                                                                                                                                                                                               | <b>Response</b>                                                                                                                                                                                                                                                                                                                                                                                                                                                                                                                                                                                                                                                                                                                                                        |
| <p><b>Financial Disclosure</b></p> <p>Enter a financial disclosure statement that describes the sources of funding for the work included in this submission and the role the funder(s) played. This includes grants and any commercial funding of the work or authors.</p> <p>This statement will be typeset if the manuscript is accepted for publication.</p> <p><i>Please review the <a href="#">submission guidelines</a> and the instructions link below for detailed requirements and guidance.</i></p> | <p>This work was funded by the Medical Research Council (MRC) Health Systems Research Initiative 5th call via grant MR/S013466/1 to TC at UCL Institute for Global Health, United Kingdom, YS and JS at Johns Hopkins University, United States of America, KA and AK at Diabetic Association of Bangladesh Perinatal Care Project, Bangladesh, CM at Parent and Child Health Initiative, Malawi, GS at Makerere University School of Public Health, Uganda, and ME at University of Oxford, United Kingdom; and by the Bill &amp; Melinda Gates foundation via grant INV-007644 to TM at LSHTM, United Kingdom. The funders had no role in study design, data collection and analysis, decision to publish, or preparation of the manuscript.</p>                     |
| <p><b>Competing Interests</b></p> <p>On behalf of all authors, disclose any competing interests that could be perceived to bias this work.</p> <p>This statement will be typeset if the manuscript is accepted for publication.</p> <p><i>Please review the instructions link below and PLOS Global Public Health's <a href="#">competing interests</a> policy to determine what information must be disclosed at submission.</i></p>                                                                         | <p>The authors have declared that no competing interests exist.</p>                                                                                                                                                                                                                                                                                                                                                                                                                                                                                                                                                                                                                                                                                                    |
| <b>Data Availability</b>                                                                                                                                                                                                                                                                                                                                                                                                                                                                                      | <p>All data is derived from qualitative interviews, most with stakeholders where only one individual holds a position, either within federal or state government, facilities, or NGOs. Every care has been taken to ensure anonymity of the data in the submitted</p>                                                                                                                                                                                                                                                                                                                                                                                                                                                                                                  |

Before publication, Authors are required to make fully available and without restriction all data underlying their findings. Please see our [PLOS Data Policy](#) page for detailed information on this policy.

A **Data Availability Statement**, detailing where the data can be accessed, is required at first submission. Insert your Data Availability Statement in the box below.

Please see the [data reporting](#) section of our submission guidelines for instructions on what you need to include in your Data Availability Statement.

This statement will be typeset if the manuscript is accepted for publication.

*PLOS allows rare exemptions to address legal and ethical concerns. If you have legal or ethical restrictions, please use the box below to detail these in full sentences for the Journal team to consider.*

manuscript but the authors from all 4 countries feel strongly that making data freely available would jeopardise the conditions of informed consent. Data is available upon reasonable request to point of contact at the London School of Hygiene and tropical Medicine: [researchdatamanagement@lshtm.ac.uk](mailto:researchdatamanagement@lshtm.ac.uk)"

1 **Opportunities to sustain a multi-country quality of care network: lessons on the actions of**  
2 **four countries Bangladesh, Ethiopia, Malawi, and Uganda**

3

4 **Authors:** Seblewengel Lemma<sup>1\*</sup>, Callie Daniels-Howell<sup>2</sup>, Asebe Amenu Tufa<sup>3</sup>, Mithun Sarker<sup>4</sup>,  
5 Kohenour Akter<sup>4</sup>, Catherine Nakidde<sup>5</sup>, Gloria Seruwagi<sup>5</sup>, Albert Dube<sup>6</sup>, Kondwani Mwandira<sup>6</sup>,  
6 The QCN Evaluation group, Desalegn Bekele Taye<sup>7</sup>, Mike English<sup>8</sup>, Yusra Ribhi Shawa<sup>9</sup>,  
7 Kasonde Mwaba<sup>2</sup>, Nehla Djellouli<sup>2</sup>, Tim Colbourn<sup>2</sup>, Tanya Marchant<sup>1</sup>

8

9 **Affiliation**

10 <sup>1</sup> **Department of Disease Control, London School of Hygiene & Tropical Medicine, based in**  
11 **Ethiopia**

12 <sup>2</sup>**Institute for Global Health, University College London, UK**

13 <sup>3</sup> **Ethiopian Public Health Institute, Addis Ababa, Ethiopia**

14 <sup>4</sup>**Perinatal Care Project, Diabetic Association of Bangladesh, Dhaka, Bangladesh**

15 <sup>5</sup>**School of Public Health, Makerere University, Kampala, Uganda**

16 <sup>6</sup>**Parent and Child Health Initiative PACHI, Lilongwe, Malawi**

17 <sup>7</sup>**Ministry of Health, Health Service Quality Directorate, Addis Ababa, Ethiopia**

18 <sup>8</sup>**Centre for Tropical Medicine and Global Health, University of Oxford, Oxford, UK**

19 <sup>9</sup>**Bloomberg School of Public Health and Paul H. Nitze School of Advanced International**  
20 **Studies, John Hopkins University, Baltimore, USA**

21 **\*Corresponding author: Seblewengel Lemma**

22 [Seblewengel.Abreham@lshtm.ac.uk](mailto:Seblewengel.Abreham@lshtm.ac.uk)

23

## 24 **Abstract**

25 The Quality of Care Network (QCN) is a global initiative that was established in 2017 under  
26 the leadership of WHO in 11 low-and- middle income countries to improve maternal,  
27 newborn, and child health. The vision was that the Quality of Care Network would be  
28 embedded within member countries and continued beyond the initial implementation  
29 period: that the Network would be sustained. This paper investigated the experience of  
30 actions taken to sustain QCN in four Network countries (Bangladesh, Ethiopia, Malawi, and  
31 Uganda) and reports on lessons learned. Multiple iterative rounds of data collection were  
32 conducted through qualitative interviews with global and national stakeholders, and non-  
33 participatory observation of health facilities and meetings. A total of 241 interviews, 42  
34 facility and four meeting observations were carried out. We conducted a thematic analysis  
35 of all data using a framework approach that defined six critical actions that can be taken to  
36 promote sustainability. The analysis revealed that these critical actions were present with  
37 varying degrees in each of the four countries. Although vulnerabilities were observed, there  
38 was good evidence to support that actions were taken to institutionalize the innovation  
39 within the health system, to motivate micro-level actors, plan opportunities for reflection  
40 and adaptation from the outset, and to support strong government ownership. Two actions  
41 were largely absent and weakened confidence in future sustainability: managing financial  
42 uncertainties and fostering community ownership.

43 Evidence from four countries suggested that the QCN model would not be sustained in its  
44 original format, largely because of financial vulnerability and insufficient time to embed the  
45 innovation at the sub-national level. But especially the efforts made to institutionalize the

46 innovation in existing systems meant that some characteristics of QCN may be carried  
47 forward within broader government quality improvement initiatives.

48 **Key Words:** government ownership, institutionalization, community engagement, adoption,  
49 financial sustainability, quality of care, Network, maternal and newborn health, Bangladesh,  
50 Ethiopia, Malawi, Uganda

51

## 52 **Introduction**

53 The Quality of Care Network (QCN) is a global initiative that was established in 2017,  
54 motivated by the slow progress of countries in reducing maternal and newborn mortality,  
55 especially from preventable causes[1]. Evidence on the lack of equitable access to high  
56 quality health services for mothers, newborn and children [2] prompted the publication of  
57 standards and guidelines that promote high quality care [3,4]. Support for country-driven  
58 action plans for sustainable, high-quality care was recognised as a gap. Under the leadership  
59 of the World Health Organization (WHO), QCN was established to address that gap, with  
60 eleven participating Network countries namely Bangladesh, Côte d'Ivoire, Ethiopia, Ghana,  
61 India, Kenya, Malawi, Nigeria, Sierra Leone, Uganda, and the United Republic of Tanzania. In  
62 addition to these country governments and the WHO, QCN also encompassed  
63 implementing, technical and donor partner organisations. Together these countries and  
64 partners created a platform for learning to understand how to implement and sustain  
65 quality of care initiatives at national and sub-national levels [1]. This paper concludes the  
66 collection of papers to examine the performance of QCN, focusing on four Network  
67 countries: Bangladesh, Ethiopia, Malawi, and Uganda (Supplement 1). Here, we focused on  
68 the sustainability of the Network after five years of development and implementation.  
69 Despite its importance, the concept of sustainability is not yet well defined and there is  
70 inadequate effort to measure sustainability of innovations [5–7]. In this paper we take  
71 sustainability of health programs to mean the continuity of a program after the  
72 implementation phase [5]. It is important that this continuity be planned alongside program  
73 implementation in order for communities to reap the long term benefit of interventions  
74 [8,5,9]. Without planning for sustainability, externally funded innovations that do not have

75 strong government ownership are likely to lose momentum and cease to function when the  
76 funding agency withdraws or stops its support [9–11].

77 In an attempt to understand and potentially pre-empt this, studies have tried to identify the  
78 factors affecting sustainability and scaleup [5,7,10–14]. Building from these,  
79 Wickremasinghe and colleagues refined and summarized six actions that a donor funded  
80 innovation can implement to promote sustainability. These actions are (1) planning  
81 opportunities for reflection and adaptation from the outset (to ensure that innovations are  
82 fit for purpose through continuous engagement with government, and relevant  
83 stakeholders); (2) supporting strong government ownership with a plan for a phased  
84 transition of responsibilities as external partners withdraw (to ensure government support  
85 for and commitment to current and future implementation success); (3) motivating micro-  
86 level actors (to ensure that the needs and gaps of local level actors are understood such that  
87 they are enabled to engage and implement the innovation. In this paper, micro-level actors  
88 are health care workers and the supporting team at the lower level of the health system);  
89 (4) institutionalizing the innovation within the health system (to ensure that implementation  
90 is embedded within existing systems to enhance ownership, efficiency and reduce  
91 duplication); (5) managing financial uncertainties (to ensure financial commitment from  
92 governments such that innovation costs are included in the government budget plan); and  
93 (6) fostering community ownership (to ensure that community groups, for example clients  
94 of the health service or community groups, have the opportunity to catalyse the continuity  
95 of the innovation through advocacy and ensure accountability in the implementation of the  
96 innovation [10].



97 Here we report on the presence or absence of these actions in the context of QCN  
98 implementation, reflecting on how the potential for Network sustainability in four countries  
99 was affected.

## 100 **Method**

101 This analysis was part of the multi-country evaluation of QCN, the methods of which are  
102 reported in our common methods supplement for our QCN Evaluation collection of papers  
103 (Supplement 2). Key aspects of the methods in relation to this paper are summarized here.

### 104 **Study setting:**

105 The study was conducted in four QCN countries, namely Bangladesh, Ethiopia, Malawi, and  
106 Uganda; the study was started in 2018 except in Ethiopia that joined the study in 2019. An  
107 overview of key country characteristics is provided in Table 1.

108 *Bangladesh:* Maternal, newborn and child health (MNCH) is a priority agenda for Bangladesh  
109 with a population of more than 165 million [15]. According to the national health,  
110 population, and nutrition sector plan for the year 2017-2022, the government of Bangladesh  
111 has striven to improve the health of mothers and newborns through making home delivery  
112 safe, improving access to and utilization of emergency obstetric services, and improving  
113 access to newborn and child health care at the lower level of the health system [16]. Since  
114 2017, the government of Bangladesh with implementing partners launched the QCN; it  
115 currently has 28 learning districts out of 62 districts, where Quality Improvement (QI)  
116 activities have been implemented (Table 1).

117 *Ethiopia:* The second most-populous country in Africa, Ethiopia achieved its Millennium  
118 Development Goals (MDGs) for maternal and child health [17]. There have been a number

119 of government-led initiatives that explicitly address quality improvement and most recently,  
120 the Ministry of Health (MOH) adopted the national maternal and newborn quality of care  
121 roadmap for the year 2017-2020 [18]. This roadmap closely aligns with QCN activities which  
122 have been implemented in 14 learning districts out of 770 districts [19].

123 *Malawi:* Malawi is less populous compared to the other case study countries [20] (Table 1).  
124 Following its success in achieving its MDG target for child health, the MOH in Malawi  
125 engaged in initiatives that aimed to improve the health of mothers and newborns. The  
126 country established the Quality Management Directorate (QMD) within the MOH to  
127 improve service quality, addressed quality of service in its Health Sector Strategic Plan  
128 (HSSP-II) and developed its National Quality Policy and Strategy [21]. The MOH along with its  
129 partners have been implementing QI interventions in six learning districts out of 28 total  
130 districts in the country.

131 *Uganda:* Uganda with a population size of more than 47 million[22] is also striving to  
132 improve quality of health service provision to improve the health of mothers and newborns.  
133 Uganda's adoption of various components of quality in healthcare dates back to 1994 [23]  
134 initially driven by quality management interventions in HIV/AIDS, TB and malaria. In the  
135 recent past, the national standards, guidelines, and policies on maternal and newborn  
136 health (MNH) quality of care (QoC) as well as the health sector QI framework and health  
137 sector strategic plan 2015/16–2019/20 have been developed. The MOH has begun to  
138 implement QI interventions in six learning districts out of 111 total districts in the country  
139 [24].

140

141 **Table 1: Demographic and mortality characteristics for the four case study countries**

| Characteristics                                   | Bangladesh | Ethiopia | Malawi | Uganda |
|---------------------------------------------------|------------|----------|--------|--------|
| Total population size (million) <sup>1</sup>      | 166.3      | 117.9    | 19.6   | 47.1   |
| Total number of districts                         | 64         | 832      | 28     | 136    |
| Maternal Mortality Ratio per 100,000 <sup>2</sup> | 173        | 401      | 349    | 336    |
| Under 5 Mortality Rate per1000 <sup>3</sup>       | 29.3       | 59       | 59.1   | 58.4   |
| Neonatal Mortality rate per 1000 <sup>4</sup>     | 17         | 33       | 19     | 19     |
| Date launched QCN                                 | 2017       | 2017     | 2017   | 2017   |
| Number of QCN learning districts                  | 28         | 14       | 6      | 6      |
| Number of QCN learning facilities                 | 298        | 48       | 25     | 18     |

142 <sup>1</sup> Population size from World Bank 2021 <https://data.worldbank.org/indicator>[17,20,22,15]

143 <sup>2</sup> Bangladesh, Ethiopia, and Malawi MMR estimates from World Bank 2017[25,26]; Uganda  
144 from UDHS2016[27]

145 <sup>3</sup> Under 5 MR Bangladesh, Malawi and Uganda(global age -sex-specific fertility and  
146 mortality rate 2019) [28]; Ethiopia (Mini-DHS 2019)[29]

147 <sup>4</sup>NMR Ethiopia (Mini-DHS 2019), UNICEF DATA (2020) Bangladesh, Malawi and Uganda  
148 [25,26,29,30]

149

150 **Design:**

151 To explore the actions taken by the QCN actors that affect the potential for sustainability, a  
152 thematic analysis [31] of qualitative interview data and observations from the participating  
153 four countries and from interviews with global-level actors was conducted.

154 **Data Collection:**

155 For the purpose of this analysis, two data sources were accessed across the four countries  
156 (Table 2), and described below.

157 *Semi-structured interviews*

158 First, semi-structured qualitative interviews with national (n=122) and sub-national (107)  
159 level Network members and key stakeholders were conducted. Several iterative rounds of  
160 interviews were conducted in each country, typically at least six months apart, to capture (a)

161 changes in how the Network was operating, (ii) views pertaining to Network activities at the  
 162 time of interview, and (iii) follow-up on emerging findings from the previous round. The  
 163 participants were recruited purposively by identifying MOH and partner organizations  
 164 involved in QCN who could provide rich information about the Network (Table 2).

165 **Table 2: Qualitative interviews and health facility observations completed, by time, in**  
 166 **each country.**

| Case-study Country | Data collection dates   | National interviewee (n) | Sub-national Interviewee (n) | Facility Observation (n) |
|--------------------|-------------------------|--------------------------|------------------------------|--------------------------|
| Bangladesh         | 1 (Oct 2019 – Mar 2020) | 13                       | 7                            | 3                        |
|                    | 2 (Oct 2020 – Jan 2021) | 14                       | 11                           | 0                        |
|                    | 3 (May 2021 – Sep 2021) | 10                       | 12                           | 4                        |
|                    | 4 (Jan 2022 – Mar 2022) | 8                        | 0                            | 0                        |
| Ethiopia           | 1 (Jan 2021– Mar 2021)  | 8                        | 11                           | 4                        |
|                    | 2 (Nov 2021 – Dec 2021) | 10                       | 11                           | 3                        |
| Malawi             | 1 (Oct 2019 – Mar 2020) | 7                        | 12                           | 4                        |
|                    | 2 (Nov 2020 – Jan 2021) | 10                       | 7                            | 4                        |
|                    | 3 (Aug 2021 – Nov 2021) | 9                        | 7                            | 4                        |
|                    | 4 (Mar 2022)            | 2                        | 3                            | 0                        |
| Uganda             | 1 (Nov 2020 – Mar 2021) | 7                        | 13                           | 4                        |
|                    | 2 (Jun 2021 – Sep 2021) | 12                       | 8                            | 4                        |
|                    | 3 (Feb 2022 – Mar 2022) | 10                       | 5                            | 4                        |

167  
 168 Concurrently, semi-structured interviews were also conducted with QCN global actors (n=7  
 169 in Mar-2021 and n=14 during Nov-2021–Feb-2022). The number of interviews at each  
 170 setting was based on having sufficient information saturation to answer our research  
 171 questions. These interviews explored views on attributes of QCN and its operational  
 172 strategy and performance that might affect the sustainability of QCN, among other things  
 173 (Supplement 2).

174 *Non-participant observations*

175 Second, non-participant observations were conducted. In QCN health facilities, these were  
176 conducted via visits to two well and two least performing QCN health facilities in each case  
177 study country in two to three iterative rounds (Table 2). Well and least performing QCN  
178 health facilities were purposively selected through discussion with key stakeholders and  
179 review of facility-level maternal and newborn health outcome and other quality of care data  
180 (e.g., those used in national schemes). During these facility observations, structured  
181 templates were used to capture key processes relevant to the focus of the Network in each  
182 country, as well as unstructured notes. In addition, non-participant observations of key  
183 national-level and district level meetings were conducted during which processes and  
184 priority discussion topics were captured through unstructured notes. These meetings were  
185 usually organized by national level actors such as MOH and the schedule and purpose of the  
186 meeting was communicated by the host or during partner interviews. Finally, one global  
187 level QCN meeting was observed during the study period.

#### 188 **Analysis:**

189 We performed a thematic analysis of the qualitative interviews and observations. A  
190 framework approach[32] was used to analyse the data based on a priori themes around six  
191 critical actions summarised by Wickremasinghe and others to define the actions that actors  
192 at different levels can take to help sustain innovations (table 3). We developed a matrix  
193 based on the themes, and codes that fall under each theme were assigned (supplement 3).  
194 All the co-authors reviewed and approved the matrix. Then the data was charted into the  
195 matrix for each country including the quotes that represent the summary data. We analysed  
196 and interpreted the data for each country first and after receiving feedback from each  
197 country data lead, the results were further analysed and interpreted, identifying similarities

198 and differences across countries and results were presented using the six sustainability  
 199 actions. We defined community as patients, clients of the health service, families or  
 200 members of local community who have stake in the health service provision.

201 Table 3: Six critical actions to help sustain innovations [10]

| # | Critical action                                                      | Rationale                                                                                                                                                                                                                                    |
|---|----------------------------------------------------------------------|----------------------------------------------------------------------------------------------------------------------------------------------------------------------------------------------------------------------------------------------|
| 1 | Planning opportunities for reflection and adaptation from the outset | Building in the expectation that there will be a need to continuously learn, reflect and adapt processes can help innovations be fit for purpose in the real world                                                                           |
| 2 | Strong government ownership                                          | Enabling government leadership in planning, inception and implementation strengthens the potential for commitment to, and responsibility for, innovations in the longer term                                                                 |
| 3 | Motivating micro-level actors                                        | Consideration of the needs and preferences of local-level implementers is essential for most innovations                                                                                                                                     |
| 4 | Institutionalizing the innovation within the health system           | Integration of processes (eg supervision, supply chain, data) within existing systems promotes ownership, reduces duplication, improves efficiency                                                                                           |
| 5 | Managing financial uncertainties                                     | Seeking sustained financial commitment from government, e.g. adding innovation costs to strategic plans and budgets, works alongside institutionalization and can help to minimise the impact of system shocks, e.g. a change in government. |
| 6 | Fostering community ownership                                        | Community groups can be important advocates for the continuation of innovations and hold leaders to account                                                                                                                                  |

202

203 **Ethics**

204 All data collection was conducted after obtaining written consent, including separate  
 205 consent for tape recording. Patients’ privacy was respected during hospital observations.  
 206 Our study didn’t include minors as study participants. All data is confidential and  
 207 anonymised. Ethical approval was obtained from the Research Ethics Committee at

208 University College London (3433/003); institutional review boards in Bangladesh, BADAS  
209 Ethical Review Committee (ref: BADAS-ERC/EC/19/00274), Ethiopian Public Health Institute  
210 Institutional Review Board (ref: EPHI-IRB-240-2020), National Health Sciences Research  
211 Committee in Malawi (ref: 19/03/2264) and Uganda Makerere University School of Public  
212 Health- Higher degrees Research Ethics Committee in Uganda (ref: Protocol 869)  
213

214 **Results**

215 Results are synthesized across the experience of the learning districts and health system of  
 216 four QCN countries. We draw on the evidence described in Table 2, in addition to the  
 217 interviews and observations with global level actors to identify whether each action was  
 218 present and how it influenced the potential for Network sustainability at the scale it had  
 219 been implemented at during this investigation. To give a snapshot of experience by country,  
 220 we also present a high-level summary of these actions by country (Table 4). Overall, the  
 221 evidence from Bangladesh suggested that all sustainability actions were present during QCN  
 222 implementation to a certain degree. Other countries experienced more limited engagement  
 223 across the set of actions, especially apparent around managing financial uncertainty and  
 224 fostering community engagement.

225 **Table 4: Status of the sustainability actions in the four QCN countries**

| Sustainability actions                                         | Bangladesh | Ethiopia | Malawi | Uganda |
|----------------------------------------------------------------|------------|----------|--------|--------|
| 1. Planning opportunities for reflection and adaptation        | Green      | Green    | Yellow | Yellow |
| 2. Government ownership with a plan for a phased transition    | Yellow     | Yellow   | Yellow | Yellow |
| 3. Motivating micro-level actors                               | Green      | Green    | Green  | Green  |
| 4. Institutionalizing the innovation within the health system, | Yellow     | Yellow   | Yellow | Yellow |
| 5. Managing financial Uncertainties                            | Yellow     | Red      | Red    | Red    |
| 6. Fostering community engagement                              | Yellow     | Red      | Yellow | Red    |

226 **\*Green** represents the weight of evidence suggest the presence of the action on multiple  
 227 accounts, if not all. **Yellow** represents that evidence indicates the action to be present to  
 228 some degree, but with some vulnerability or weakness. **Red** represents there is no evidence  
 229 in the data to indicate the action exists.



230 **1. Planning opportunities for reflection and adaptation**

231 All respondent types interviewed reported that opportunities for planning, reflection and  
232 adaptation were embedded in the Network approach at the global, national, and sub-  
233 national levels, although some vulnerability was described in Malawi and Uganda.

234 At the global level, between countries, respondents recalled the importance of holding  
235 repeat, joint international meetings with global partners, held in Malawi in 2017, Tanzania  
236 in 2018, and Ethiopia in 2019. These meetings promoted the importance of country  
237 engagement with the Network and encouraged learning. A respondent in Bangladesh  
238 noted:

239 *“But I was in that [QCN] meeting along with the government .... the ministry agreed, and the*  
240 *team participated in that Malawi workshop. .... we had highest policy level commitment to*  
241 *participant in the QCN network”* (Implementing Partner- National-Bangladesh Round 1).

242 However, some respondents commented that there was limited follow-up and support from  
243 the global actors to see if the learning at the global level was adopted at the national level.

244 At the national level, respondents acknowledged opportunities for reflection and adaptation  
245 from the outset in the form of joint consultative meetings and joint assessments. During  
246 these meetings, activities were planned, learning sites selected, and then partner  
247 organisations contributions discussed and coordinated. This type of national level  
248 engagement was particularly strongly reported in Ethiopia, including the MOH and partner  
249 organizations organising a joint quality summit in the country.

250 In all countries there was also evidence that the generic quality of care standards from the  
251 WHO Quality of Care framework were adapted to meet the needs of government quality

252 management directorates. A respondent capitalized on the importance of contextualizing  
253 interventions at the country level as follows:

254 *“...economically we are different, the setups of the government are different. For instance,*  
255 *we take Malawi, and we compare it with South Africa its [implementation] will be totally*  
256 *different but the standards will be the same.”* (Government-Local case 1-Malawi round 2)

257 Finally, at sub-national levels in all countries, the restriction of implementation to a small  
258 number of learning health facilities, with the intention to foster learning for future scale-up,  
259 automatically implied built in opportunity for reflection and adaptation. These learning sites  
260 also had opportunities for reflection during the learning forums where health facilities with  
261 better performance in QI work shared their experience. However, linkages between  
262 reflective learning at national and sub-national levels did not always lead to adaptation in  
263 practice, for example in Uganda and Malawi where QCN structures at the sub-national and  
264 local level were reported to be less strong respectively.

265 *“At the district level, they have known their part in the Network but at facility level we don’t*  
266 *really mention the Network. We mention it during training, but they are not that conscious*  
267 *about it, although they know that there are facilities within the district that are also*  
268 *implementing and that they need learn and share and thus should hold meetings every*  
269 *quarter to come together and learn from each other. The importance of the Network at the*  
270 *district level is not so high, it is more at the national level.”* (Government-National-Uganda  
271 round 2)

272

273 **2. Strong government ownership with a plan for a phased transition**

274 All countries demonstrated strong ownership of the QCN, at least in terms of political and  
275 normative commitments. However, none of the countries had a plan for transition when  
276 QCN partners had completed their contract of implementation.

277 At the global level, there was a push for country governments to take ownership of their  
278 respective QI activity. WHO provided technical support, developing guidelines and  
279 frameworks such as the LALA (leadership, action, learning and accountability) framework  
280 which facilitated the implementation and monitoring of the Network activity at national and  
281 sub-national levels. WHO's approach of leadership was also appreciated as being non-  
282 prescriptive, actively seeking buy-in and ownership from partners and country governments.

283 At the national level, the MOH of each country took ownership of the QCN initiative and  
284 enlisted partner support. In Ethiopia, QCN was reported as the Ministry's flagship program,  
285 creating technical committees and organizing partners' efforts. Similarly, in Bangladesh a  
286 government academic institution, National Institute of Preventive and Social Medicine  
287 (NIPSOM) supported MoH in the implementation of the Network, together with other  
288 partners.

289 *"The Government has many initiatives especially in the context of quality of care. It's*  
290 *basically a government program."* (Implementing Partner-National-Bangladesh round 1).

291 However, a vulnerability that was reported across countries was the fact that the national  
292 MOH quality directorates worked in isolation; it was thought that better integration of  
293 quality across directorates could further strengthen ownership of the Network.

294

295 *“I think one other problem we have in higher offices in the ministry is that programs are*  
296 *working in isolation. And we know worldwide that we cannot achieve quality, or we cannot*  
297 *make quality improvement if we try to work as individuals. So, the departments need to*  
298 *come together and be seen of the ground together and move forward” (Health facility*  
299 *worker-Local case 4-Malawi round 3)*

300 Between countries, government ownership was not uniform at the sub-national level. In  
301 Malawi, the structure that was established at the national level went to the lower-level  
302 health system, down to the community. In Bangladesh, the Civil Surgeons took leadership of  
303 the QI activities at sub-national level. But in Ethiopia and Uganda government ownership  
304 was relatively weaker at the sub national level. In Uganda, the system didn’t cascade down  
305 to the lower level of the health system and in Ethiopia a lack of commitment was observed  
306 from the regional health system. A respondent from Ethiopia commented:

307 *“We have no role in the Network so there cannot be conflict of interest. We do mentorship &*  
308 *coaching at three hospitals. Other than that, the structure is not stretched down. At the*  
309 *office level, we are not required to provide support. .... to be frank the plan is not ours; it is*  
310 *MOH’s plan.” (Government-Local-Ethiopia Round 1)*

311 Although the MOH of the respective countries took ownership of the Network, and activities  
312 took place within existing structures, a particular vulnerability was that implementation was  
313 usually facilitated by the implementing partners through individual projects.

314 *“... regionalized support like UNICEF is already in certain districts, so they have been*  
315 *supporting that work in their districts. That’s how it’s been working and then Government*  
316 *sort of takes the middle piece where if there is capacity building, they support that, although*

317 *other partners have also done their part in capacity building and trainings within their*  
318 *budgets.” (Government-National-Uganda round 2)*

319 While the strong ownership and coordination at national level was positive, the more  
320 fragmented ownership sub-nationally, and the approach of partners implementing activities  
321 on a project basis, limited the opportunity for a phased transition of responsibilities in all  
322 countries. Some partners did not have a vision for long term engagement, beyond their  
323 current funding, and sub-national leaders did not feel confident that they would have the  
324 resources to implement without partner support.

325 *“...you know some other partners just come and then disappear. So sometime other partners*  
326 *are inactive, and some partners will come and say, I think our funding has finished. And*  
327 *when their funding has finished they just disappear, and they even don't say anything and*  
328 *this has been a problem” (Government-Local case 2-Malawi round 2)*

### 329 **3. Motivating micro-level actors**

330 All four countries employed various mechanisms to motivate the healthcare workers and  
331 those supporting the work of health facilities at a grass root level in relation to the QCN  
332 work. An incentive mechanism in the form of small funding or grants for health facilities was  
333 reported in Bangladesh, Ethiopia, and Uganda as part of the QCN intervention. This  
334 incentive approach was appreciated by the respondents because it created an enabling  
335 environment for the health workers to be innovative in identifying, prioritizing, and solving  
336 problems within their health facility. The incentive was also given to their health facility as a  
337 form of reward for the best performer in quality service provision.

338 " They [facility workers] come [to a fair] and participate in a competition. Whose  
339 performance is the best according to the report? An award is given according to the [facility]  
340 performance. It is given facility wise and inter-district wise." (Government-Local case 1-  
341 Bangladesh round 1)

342 In addition, several respondents confirmed that the knowledge and skills gained through the  
343 extensive training linked to the Network activities further fostered motivation.

344 "Without having knowledge, there is no motivation to do the work. Now when they realized  
345 that they could do better, now they do the work with more enthusiasm and do the work with  
346 more quality." (Government-Local case 1-Bangladesh round 1).

347 "The activities[training] are nice because it fills the skill gaps. As you know even though most  
348 of our workers have theoretical knowledge they lack skills. ....In the process of filling the skill  
349 gaps indicators are presented, detail technical works are also included. Because of this, I am  
350 interested in the activities. These are technical duties that help professionals to follow every  
351 step to provide health services." (Government-Local-Ethiopia round 1)

352 Nonetheless, despite the positive comments on QCN actions to motivate micro-level actors,  
353 two areas of concern were broadly noted. First that while such incentives were observed to  
354 positively motivate micro-level actors during this phase of QCN, the use of financial  
355 incentives for individuals might not be sustainable in the longer term or if QCN activities  
356 were scaled up beyond the current learning areas. And second, if deficiencies in health  
357 facility structural quality persisted into the future, or if career progression for health  
358 workers was limited, then the QCN actions to motivate the workforce would be weakened.

359 *“...there are a lot of demotivators yah? Maybe career paths. Frustrations also come with*  
360 *small issues like infrastructure in which the staff are working in.”* (Government-National-  
361 Malari round 2)

#### 362 **4. Institutionalizing the innovation within the health system**

363 Implementers in all four countries were keen to work within the existing health system, to  
364 avoid creating parallel systems, and to enable the physical environment for QI through  
365 investment in existing infrastructure, job aids and guidelines. In each country, Network  
366 activities were located within a designated government unit or department that was  
367 responsible for health care quality. For example, in Ethiopia, QCN had a designated person  
368 at each level of the health system, and activities were coordinated as part of the national  
369 plan, with some variation at sub-national levels. In Malawian hospitals, Network activities  
370 were integrated in Quality Management Units, working through pre-existing Quality  
371 Improvement Support Teams. However, the institutionalization of QI in Malawi was not  
372 perceived to be adequate and respondents suggested to have QI as part of the tertiary level  
373 education, so that health workers would have adequate knowledge and understanding of QI  
374 when they joined the workforce.

375 *“My best bet would be to have as many officers, as many frontline workers playing in quality*  
376 *...We should be really thinking about... if graduates are coming straight from college, they*  
377 *should already know that quality is built in every clinical program and that it’s not something*  
378 *that is separate, but it is part of that clinical training. So, the training in MNH, then QI is part*  
379 *of it because quality is eventually what we need... that’s how we serve a customer.”*  
380 (Implementing partner-National-Malawi round 3)

381 Learning forums and training were thought to play an important role in institutionalizing QI  
382 in the health system. The learning forums allowed transfer of knowledge and skill within  
383 and across health facilities and these were shared by health workers and managers with  
384 their colleagues and remained in the health system. As was the advocacy work that partners  
385 carried out to raise awareness about the initiative. An example was reported from Ethiopia  
386 of a region that had started to prepare a quality improvement bulletin to give more voice to  
387 the Network idea.

388 However, four vulnerabilities emerged that limited institutionalisation efforts. First, the  
389 consequences of losing partner support at the end of their funded project period was  
390 described as a problem that weakened the Network as MOH struggled to fill the gap and  
391 maintain momentum.

392 *“...what scares us most is the question ‘If the partners left, would the initiative continue?’.*  
393 *They are very supportive of QI projects. As I said if you go to the district level and observe*  
394 *you may observe many QI projects. This is due to the partner organizations. ... Sometimes I*  
395 *wonder if the program only lasts as long as those partners exist. Perhaps if they left, I am not*  
396 *sure about the continuity. But for now, it is good.”* (Government-National- Ethiopia round 1)

397 Second, respondents mentioned that partner priorities did not always perfectly align with  
398 the real-world needs in the country, especially at sub-national levels where de-centralised  
399 decision making was needed. As reported in Uganda, multiple partners invested on the  
400 same activity when it was known that it was not a priority for the district. A respondent  
401 from Malawi also described existing misalignment between partner and government  
402 priorities as follow:



403 *“the challenge with our partners when they are coming into they have their own objectives*  
404 *to achieve that may be line with what we want but they are coming in the name of quality*  
405 *but not on the specifics that we are targeting so thus what I can say over that one”*

406 (Government-Local case 1- Malawi round 2)

407 Third, some respondents reported fragmentation of implementation according to the  
408 presence of different implementing partners who had different organizational missions and  
409 vision. This was emphasised by respondents from Bangladesh, where the implementing  
410 partners divided the implementing areas among themselves, but activities carried out  
411 according to their own pace, with different level of intensity.

412 And finally, the COVID 19 pandemic shifted both emphasis and resources away from the  
413 quality improvement activities and tested the strength and depth of institutionalization of  
414 the Network activities within the health system. A respondent from national implementing  
415 partner in Ethiopia reported that because of the COVID-19 outbreak, their organization had  
416 to close all its program including QCN and transferred their budget to COVID-19 response.

## 417 **5. Managing financial uncertainties**

418 Initial Network initiatives in all countries were heavily supported by implementing  
419 organizations through external funding. As seen at the global level, the funding for QCN  
420 came primarily from the Bill and Melinda Gates foundation (BMGF) and USAID; the  
421 contribution of WHO through its staff time was also noted. At national level, however, some  
422 progress of financial commitment from government was observed, particularly for  
423 coordination efforts, though less so for implementation, which was mostly still dependent  
424 on partner organisation **budgets**. In Ethiopia and Uganda, there was some evidence of  
425 government financial support or budget allocated to QI. And in Bangladesh, several

426 respondents noted the government’s long-standing commitment to achieving universal  
427 health coverage, consistent with the goals of the Network. Here, where QCN was observed  
428 to be particularly well assimilated in government plans, it was impossible to see Network  
429 activities separately from government QI actions, creating a strong belief that the  
430 government would manage financial uncertainties, as exemplified by a respondent from a  
431 partner organization:

432 *“It’s a project that you are talking about, but we are not concerned about the time of QCN*  
433 *project because the quality improvement initiative that we are doing is part of the*  
434 *government plan, there is nothing with that QCN project. Even we don’t use this term QCN,*  
435 *so this is part of our sector programme. This is the way we are supporting; we are taking it*  
436 *forward as part of their operational plan and sector plan. And now they have developed the*  
437 *quality strategy and now we’ll develop the action plan, and they will go beyond 2022....”*

438 (Implementing partner-National- Bangladesh round 4)

439 But other countries expressed concern about the continuity of QCN efforts in the absence of  
440 external funding. Although Ethiopia did try to manage interruption of funding when an  
441 individual support partner phased out by committing budget to QCN activities, this effort of  
442 the government was jeopardised by external shocks such as COVID 19.

443 Similarly in Malawi, a respondent commented about the fate of QCN in the absence of  
444 external funding:

445 *“But I find the issue to do with financing more of a cause for us to fail. This is because look at*  
446 *all the components of the health system and I find... well... I was trying at this particular time*  
447 *to think about the investments that have happened for example in Kasungu, as a learning*  
448 *district. How much did government commit to the goal that we reduce the maternal*

449 *mortality rate by fifty per cent in the implementing (of the project) in the nation and districts*  
450 *by 2022? If we are to be honest, success of every implementing district was dependant on*  
451 *the kind of and the flexibility of partners that are in the district.” (Implementing partner-*  
452 *National- Malawi round 3).*

## 453 **6. Fostering community ownership and acceptance**

454 All four countries had a system for community engagement, but it was seldomly used for  
455 the purpose of the QCN except in Bangladesh and Malawi. Similarly, there was little  
456 emphasis on community engagement in relation to QCN at the global level, despite  
457 community empowerment being a central pillar of WHO’s theory of change for QCN.  
458 Community engagement was particularly strong in Bangladesh, perhaps reflecting the  
459 relatively strong health system there prior to QCN implementation. Community leaders  
460 supported QI work in hospitals and took part in monthly coordination meetings organized  
461 by the district leadership; members of the public participated in QI activities through  
462 volunteer groups and clubs; partner organizations established suggestion boxes, help desks,  
463 citizen charters and community score cards to promote community voice; and government  
464 created platforms for community meetings to advocate for quality improvement. All these  
465 initiatives were present prior to QCN but had been aligned and adapted for the same  
466 purpose. However, few said that the community engagement part is still a working progress  
467 and yet to be designed and implemented as part of the QCN work by their implementing  
468 organization.

469 *“...WHO has released a stakeholder and community engagement module. And from that*  
470 *module we have some ideas and some guidelines; how we should communicate with the*  
471 *community for this quality improvement. Right now we are in a process of developing the*

472 *Bangladesh based context module based on that WHO module...*" (Implementing partner-  
473 National-Bangladesh round 4)

474 In Malawi, community engagement was added as the ninth standard in the MNH QoC  
475 standards. A formal structure to link the community members with service providers in  
476 health facilities was established, called Health Centre Advisory Committee. This committee  
477 was responsible not only for promoting accountability but mobilized resources for the QI  
478 initiatives. Village Health Committees and Village Development Committees also played a  
479 key role in mobilizing resources.

480 *"there is a feedback mechanism where like if clients are not satisfied with the services that*  
481 *they are receiving or maybe a certain injustice has happened they do complain to the*  
482 *ombudsman and their issues get resolved. The hospital ombudsman also conducts some exit*  
483 *interviews where they check the satisfaction level of the quality of services that are being*  
484 *offered at the facility. So at the end of the month, the HO produces an exit report on how*  
485 *many clients they interviewed, how many were not satisfied with the services and the*  
486 *reasons for lack of satisfaction and others things..."* (Government-National-Malawi round 2)

487 However, not all agreed on the extent of community engagement in Malawi.

488 *".....it was found that standard nine (community engagement) is the one that is not being*  
489 *implemented in almost all the districts. There is a big challenge on the one that talks about*  
490 *community and accountability... so issues of score card is not done... so it's almost cut*  
491 *across."* (Government-Local case 3-Malawi round 3)

492 Despite the existence of strong community engagement structures in Uganda and in  
493 Ethiopia (for example through the Health Extension Programme in Ethiopia), community

494 involvement did not emerge as a strong component of Network activity. One participant  
495 reflected that this might have been an oversight that could subsequently be addressed.

496 *“Then when we come to the stakeholders and community engagement, we are not doing so*  
497 *well, UNICEF has done some work to this business of community engagement using Village*  
498 *Health Teams [the lowest point of Uganda’s health system]. But there is a gap of not*  
499 *engaging the health unit management committees [HUMCs] which bridge the community*  
500 *with facilities.”* (Implementing partner-National-Uganda round 1)

501

## 502 **Discussion**

503 Our analysis examined the presence of six critical actions to support sustainability of QCN in  
504 the limited number of implementation areas in four Network countries. Institutionalization  
505 of the innovation with the health system and motivating micro-level actors were found in all  
506 countries, while recognising that some vulnerability existed. There was also some evidence  
507 of actions taken to plan opportunities for reflection and adaptation from the outset and to  
508 support strong government ownership. However, these actions were stronger at national  
509 than subnational level. Two actions were largely absent and weakened confidence in future  
510 sustainability: managing financial uncertainties and fostering community ownership.

511 Institutionalization of QCN within existing systems was strong in all four countries, and  
512 particularly to the extent that QCN in Bangladesh and Ethiopia was recognized as part of the  
513 governments' QI initiative, not as a separate entity. The alignment of goals of QCN with  
514 country priorities and their desire to improve the health of mothers and newborn in all four  
515 countries positioned QCN as a favoured intervention. Building and sustaining institutional  
516 capability including the local capability was reported as a means to sustain a scale-up of an  
517 innovation [9,33]. However, we also witnessed that institutionalization could be affected in  
518 the presence of financial uncertainty as in Ethiopia, poor harmonization of effort among  
519 implementing partners as in Bangladesh, and suboptimal alignment of country needs with  
520 implementing partners objectives at sub-national level as in Uganda and Malawi.

521 All countries took essential steps in motivating micro-level actors, although the sub-optimal  
522 environment in which these actors worked sometimes operated against the motivating  
523 actions as reported elsewhere [34]. But QCN was regarded as a beneficial initiative for staff.  
524 The training and knowledge and skill sharing sessions were most appreciated sources of

525 motivation together with the financial incentives given to health facilities based on their  
526 performance in QI. In many low-and middle-income countries there is an insufficient  
527 number of health workforce, including in the case study countries [35]; actions to motivate  
528 health workers are important for retention in the health system [11,14]. Training was  
529 reported as a source of motivation for health workers in previous studies [36,37] as was  
530 improving the environment they operated in [34,36].

531 Opportunities for reflection and adaptation of QCN were embedded in the design with  
532 repeat learning forums at all levels. The fact that governments took the initiative to engage  
533 in conversations before embarking on QCN activity in all countries created a strong starting  
534 platform for country implementation. In addition, country commitment to global initiatives  
535 such as the SDGs created a fertile ground for QCN to act as a catalyst to achieve these global  
536 commitments. The learning forums and meetings that happened at the global, national, and  
537 sub-national level set the stage for country adaptation of QCN, crucial for accommodation  
538 of country specific contexts [11]. However, accountability for implementing learning was  
539 not optimal everywhere because of weak systems and realising opportunities for learning  
540 often relied on external support [38]. Further, more time, effort and engagement were  
541 needed at the local level to secure leadership commitment and resource.

542 There was strong government ownership of the QI initiative in all countries [39]. From the  
543 start, QCN was not rigidly prescribed by the global actors unlike many donor-funded  
544 interventions. But two areas of vulnerability included that government ownership did not  
545 extend to all levels of the health system [14,40]; and while there was confidence that QCN  
546 would continue to be a government priority going forward, none of the countries had a plan  
547 for phased transition from partner support to full government implementation. The lack of a

548 plan for phased transition had already affected the Ethiopia program as some of the  
549 implementing partners had already completed their contracted support.

550 Of the two actions observed to be less present, financial uncertainty limited the ability of  
551 the four countries to move forward in the absence of continuous support and none of the  
552 countries had a financial sustainability plan. This limitation necessarily challenges the  
553 question of the strength of ownership by country governments [10,13], but also challenges  
554 global partners to ensure that achieving financial security was central to the design. In  
555 Ethiopia and Uganda there were some attempts by the government to fill gaps in funding  
556 during the QCN implementation period. However, we didn't identify any plan laid out to  
557 manage the financial uncertainties, except the strong optimism from respondents in  
558 Bangladesh.

559 Finally, engaging the community as a sustainability action received relatively little attention,  
560 except in Bangladesh and Malawi where there was some evidence of community  
561 engagement to the extent of mobilizing domestic resources for the initiative. However, both  
562 Ethiopia and Uganda made little effort to utilize their already well-established community  
563 health system [41]. Other studies acknowledged the benefit of engaging the community in  
564 such innovative interventions to ensure community acceptance and its sustainability  
565 [10,11,14,42]. Defining community engagement or ownership in the context of QCN may be  
566 crucial to maximize gain from the community engagement process, especially in the  
567 countries where their roles in QCN was not yet defined [43].

568 Strengths and limitations of this study

569 This analysis triangulated data from key partners at the global, national, and sub-national  
570 level in the four case study countries that improved the credibility of our findings.



571 Important insights were observed about actions taken that promoted the sustainability of  
572 QCN. But the evaluation could only make inference in the context of implementation in a  
573 relatively small number of implementation districts, and over a relatively short period of  
574 implementation; it did not attempt to engage with sustainability at scale. Further, while  
575 national level participant meetings were observed, meetings at the district level were not  
576 included in the original plan: it is possible that this limited our understanding at the  
577 implementation level however, given the depth of information from individual interviews, it  
578 is unlikely to change our findings. The framework of six sustainability actions was a useful  
579 tool with which to examine whether and how the innovation could be sustained for the  
580 longer term, but some co-dependence was observed between actions such that, for  
581 example, positive remarks about government ownership and institutionalisation were made  
582 vulnerable by financial uncertainty.

### 583 **Conclusion**

584 The framework of six critical actions to promote sustainability was useful in revealing where  
585 progress was made and what more could be done to sustain improvements in MNH  
586 outcomes and quality of care. The innovation was observed to be relatively top-down, with  
587 the drive being strongest at global and national levels but with much work – and time -  
588 needed to embed QCN linked activities at the sub-national level. Crucially, it was revealed  
589 that the absence of deliberate action to address financial uncertainty was an obstacle to the  
590 sustainability of QCN. Nevertheless, the strong progress made to institutionalize some  
591 characteristics of QCN in existing government systems should be supported to avoid any  
592 stalling of progress.

593

594 **Acknowledgment**

595 We would like to thank all study respondents for their invaluable participation in the overall  
596 QCN evaluation. We also appreciate the participation of the QCN Evaluation Group, made  
597 of: Fatama Khatun, Abdul Kuddus, Kishwar Azad (BADAS-PCP Bangladesh), Gladson  
598 Monjeza, Racheal Magaletta, Zabvuta Moffolo, Charles Makwenda (Parent and Child Health  
599 Initiative, Malawi), Mary Kinney, Fidele Mukinda (independent researchers, South Africa),  
600 Will Payne, Jeremy Shiffman (Johns Hopkins University, USA), Hilda Namakula, Agnes  
601 Kyumulabi (Makerere University, Uganda) Anene Tesfa, Theodros Getachew, Geremew  
602 Gonfa (Ethiopia Public Health Institute, Ethiopia).

603

604

605

606

607

608

609 Reference

- 610 1 World Health Organization. The network for improving quality of care for maternal,  
611 newborn and child health: evolution, implementation and progress: 2017-2020 report.  
612 Geneva: : World Health Organization 2021.  
613 <https://apps.who.int/iris/handle/10665/343370> (accessed 10 Jan 2022).
- 614 2 Kruk ME, Gage AD, Joseph NT, et al. Mortality due to low-quality health systems in the  
615 universal health coverage era: a systematic analysis of amenable deaths in 137 countries.  
616 *The Lancet* 2018;**392**:2203–12. doi:10.1016/S0140-6736(18)31668-4
- 617 3 World Health Organization. Quality of care : a process for making strategic choices in  
618 health systems. 2006;:38.<https://apps.who.int/iris/handle/10665/43470> (accessed 10 Jan  
619 2022).
- 620 4 Quality health services: a planning guide. [https://www.who.int/publications-detail-  
621 redirect/9789240011632](https://www.who.int/publications-detail-redirect/9789240011632) (accessed 10 Jan 2022).
- 622 5 Hailemariam M, Bustos T, Montgomery B, et al. Evidence-based intervention  
623 sustainability strategies: a systematic review. *Implementation Sci* 2019;**14**:57.  
624 doi:10.1186/s13012-019-0910-6
- 625 6 Braithwaite J, Testa L, Lamprell G, et al. Built to last? The sustainability of health system  
626 improvements, interventions and change strategies: a study protocol for a systematic  
627 review. *BMJ Open* 2017;**7**:e018568. doi:10.1136/bmjopen-2017-018568
- 628 7 Marimuthu M, Paulose H. Emergence of Sustainability Based Approaches in Healthcare:  
629 Expanding Research and Practice. *Procedia - Social and Behavioral Sciences*  
630 2016;**224**:554–61. doi:10.1016/j.sbspro.2016.05.437
- 631 8 Pluye P, Potvin L, Denis J-L. Making public health programs last: conceptualizing  
632 sustainability. *Evaluation and Program Planning* 2004;**27**:121–33.  
633 doi:10.1016/j.evalprogplan.2004.01.001
- 634 9 Hirschhorn LR, Talbot JR, Irwin AC, et al. From scaling up to sustainability in HIV: potential  
635 lessons for moving forward. *Globalization and Health* 2013;**9**:57. doi:10.1186/1744-8603-  
636 9-57
- 637 10 Wickremasinghe D, Alkali Hamza Y, Umar N, et al. ‘A seamless transition’: how to  
638 sustain a community health worker scheme within the health system of Gombe state,  
639 northeast Nigeria. *Health Policy and Planning* 2021;**36**:1067–76.  
640 doi:10.1093/heapol/czab063
- 641 11 Spicer N, Berhanu D, Bhattacharya D, et al. “The stars seem aligned”: a qualitative  
642 study to understand the effects of context on scale-up of maternal and newborn health  
643 innovations in Ethiopia, India and Nigeria. *Globalization and Health* Published Online First:  
644 25 November 2016. doi:10.1186/S12992-016-0218-0

- 645 12 Barker PM, Reid A, Schall MW. A framework for scaling up health interventions:  
646 lessons from large-scale improvement initiatives in Africa. *Implementation Sci*  
647 2015;**11**:12. doi:10.1186/s13012-016-0374-x
- 648 13 Wickremasinghe D, Gautham M, Umar N, et al. “It’s About the Idea Hitting the Bull’s  
649 Eye”: How Aid Effectiveness Can Catalyse the Scale-up of Health Innovations.  
650 *International Journal of Health Policy and Management* 2018;**7**:718–27.  
651 doi:10.15171/ijhpm.2018.08
- 652 14 Spicer N, Hamza YA, Berhanu D, et al. ‘The development sector is a graveyard of pilot  
653 projects!’ Six critical actions for externally funded implementers to foster scale-up of  
654 maternal and newborn health innovations in low and middle-income countries.  
655 *Globalization and Health* 2018;**14**:74. doi:10.1186/s12992-018-0389-y
- 656 15 Population, total - Bangladesh | Data.  
657 <https://data.worldbank.org/indicator/SP.POP.TOTL?locations=BD> (accessed 9 Apr 2022).
- 658 16 4th Health, Population and Nutrition Sector Programme (4th HPNSP) Operational  
659 Plan (OP), Maternal Neonatal Child and Adolescent Health (MNC&AH) (January 2017 -  
660 June 2022). [http://hospitaldghs.gov.bd/wp-content/uploads/2020/01/HSM\\_OP\\_2017-  
661 22.pdf](http://hospitaldghs.gov.bd/wp-content/uploads/2020/01/HSM_OP_2017-22.pdf) (accessed 26 Jul 2022).
- 662 17 Population, total - Ethiopia | Data.  
663 <https://data.worldbank.org/indicator/SP.POP.TOTL?locations=ET> (accessed 9 Apr 2022).
- 664 18 Health M of. National MNH Quality of Care Roadmap (2017/18-2019/2020).  
665 Published Online First: 1 July  
666 2017.<https://repository.iphce.org/xmlui/handle/123456789/738> (accessed 2 Apr 2022).
- 667 19 Ethiopia | Quality of Care Network. [https://www.qualityofcarenetwork.org/country-  
668 data/ethiopia](https://www.qualityofcarenetwork.org/country-data/ethiopia) (accessed 2 Apr 2022).
- 669 20 Population, total - Malawi | Data.  
670 <https://data.worldbank.org/indicator/SP.POP.TOTL?locations=MW> (accessed 9 Apr  
671 2022).
- 672 21 Government of Malawi. Health Sector Transformation Plan II.  
673 <https://www.health.gov.mw/index.php/78-demo/slides/199-hssp-2> (accessed 10 Aug  
674 2022).
- 675 22 Population, total - Uganda | Data.  
676 <https://data.worldbank.org/indicator/SP.POP.TOTL?locations=UG> (accessed 9 Apr 2022).
- 677 23 Ministry of Health [Uganda]. The Quality Improvement methods: A manual for  
678 health workers in Uganda. 2015.
- 679 24 Uganda | Quality of Care Network. [https://www.qualityofcarenetwork.org/country-  
680 data/uganda](https://www.qualityofcarenetwork.org/country-data/uganda) (accessed 2 Apr 2022).

- 681 25 Bangladesh (BGD) - Demographics, Health & Infant Mortality. UNICEF DATA.  
682 <https://data.unicef.org/country/bgd/> (accessed 9 Apr 2022).
- 683 26 Malawi (MWI) - Demographics, Health & Infant Mortality. UNICEF DATA.  
684 <https://data.unicef.org/country/mwi/> (accessed 9 Apr 2022).
- 685 27 Demographic Health Survey, Uganda.  
686 <https://dhsprogram.com/pubs/pdf/FR333/FR333.pdf> (accessed 15 Jul 2022).
- 687 28 Wang H, Abbas KM, Abbasifard M, et al. Global age-sex-specific fertility, mortality,  
688 healthy life expectancy (HALE), and population estimates in 204 countries and territories,  
689 1950–2019: a comprehensive demographic analysis for the Global Burden of Disease  
690 Study 2019. *The Lancet* 2020;**396**:1160–203. doi:10.1016/S0140-6736(20)30977-6
- 691 29 Ephi EPHI-, FMoH FM of H-, ICF. Ethiopia Mini Demographic and Health Survey 2019.  
692 Published Online First: 15 May 2021. [https://dhsprogram.com/publications/publication-](https://dhsprogram.com/publications/publication-FR363-DHS-Final-Reports.cfm)  
693 [FR363-DHS-Final-Reports.cfm](https://dhsprogram.com/publications/publication-FR363-DHS-Final-Reports.cfm) (accessed 2 Apr 2022).
- 694 30 Uganda (UGA) - Demographics, Health & Infant Mortality. UNICEF DATA.  
695 <https://data.unicef.org/country/uga/> (accessed 9 Apr 2022).
- 696 31 Castleberry A, Nolen A. Thematic analysis of qualitative research data: Is it as easy as  
697 it sounds? *Currents in Pharmacy Teaching and Learning* 2018;**10**:807–15.  
698 doi:10.1016/j.cptl.2018.03.019
- 699 32 World Health Organization. WHO community engagement framework for quality,  
700 people-centred and resilient health services. World Health Organization 2017.  
701 <https://apps.who.int/iris/handle/10665/259280> (accessed 9 Aug 2022).
- 702 33 Walugembe DR, Sibbald S, Le Ber MJ, et al. Sustainability of public health  
703 interventions: where are the gaps? *Health Research Policy and Systems* 2019;**17**:8.  
704 doi:10.1186/s12961-018-0405-y
- 705 34 Djellouli N, Mann S, Nambiar B, et al. Improving postpartum care delivery and uptake  
706 by implementing context-specific interventions in four countries in Africa: a realist  
707 evaluation of the Missed Opportunities in Maternal and Infant Health (MOMI) project.  
708 *BMJ Glob Health* 2017;**2**:e000408. doi:10.1136/bmjgh-2017-000408
- 709 35 World Health Organization. Global strategy on human resources for health:  
710 workforce 2030. Geneva: : World Health Organization 2016.  
711 <https://apps.who.int/iris/handle/10665/250368> (accessed 22 Nov 2022).
- 712 36 Willis-Shattuck M, Bidwell P, Thomas S, et al. Motivation and retention of health  
713 workers in developing countries: a systematic review. *BMC Health Services Research*  
714 2008;**8**:247. doi:10.1186/1472-6963-8-247
- 715 37 Momanyi GO, Adoyo MA, Mwangi EM, et al. Value of training on motivation among  
716 health workers in Narok County, Kenya. *Pan Afr Med J* 2016;**23**:261.  
717 doi:10.11604/pamj.2016.23.261.8414

718 38 Mwandira. Do Networks facilitate innovation, learning and sharing? Case studies  
719 from the Quality of Care Network (QCN) evaluation. One of the Quality of Care Network  
720 papers.

721 39 Akter K. Influences on policy-formulation, decision-making, organisation and  
722 management for maternal, newborn and child health in Bangladesh, Ethiopia, Malawi  
723 and Uganda: the roles and legitimacy of a multi-country network , one of the Quality of  
724 Care Network papers.

725 40 Shelton RC, Cooper BR, Stirman SW. The Sustainability of Evidence-Based  
726 Interventions and Practices in Public Health and Health Care. *Annual Review of Public  
727 Health* 2018;**39**:55–76. doi:10.1146/annurev-publhealth-040617-014731

728 41 Djellouli N. Effectiveness of a multi-country implementation-focused network:  
729 delivery of interventions, processes, and maternal, newborn and child health outcomes,  
730 one of the Quality of Care Network papers.

731 42 Iwelunmor J, Blackstone S, Veira D, et al. Toward the sustainability of health  
732 interventions implemented in sub-Saharan Africa: a systematic review and conceptual  
733 framework. *Implement Sci* 2016;**11**:43. doi:10.1186/s13012-016-0392-8

734 43 Sarriot E, Shaar AN. Community Ownership in Primary Health Care—Managing the  
735 Intangible. *Glob Health Sci Pract* 2020;**8**:327–31. doi:10.9745/GHSP-D-20-00427

736

737 Supplement materials

738 S1: Text. PLOS Global Public Health QCN Evaluation Collection 2-page summary.

739 S2: Text. PLOS Global Public Health QCN papers common methods section.

740 S3: Table. Data coding and analysis matrix

741



Click here to access/download  
**Supporting Information**  
S1\_Text.docx



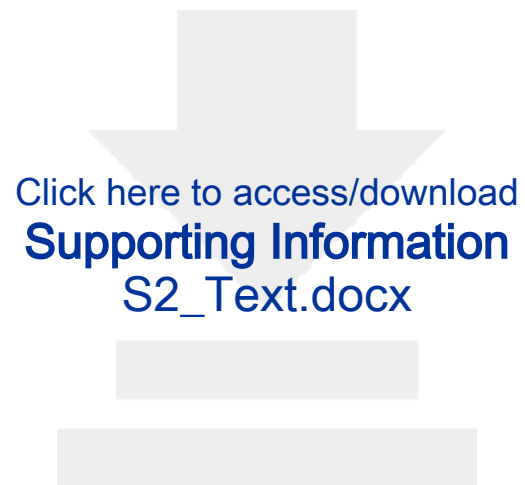



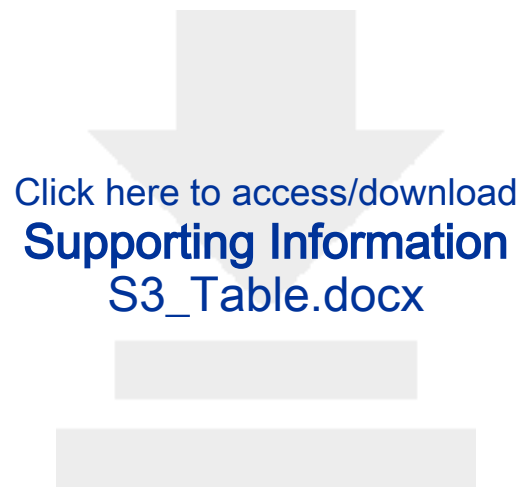

Click here to access/download  
**Supporting Information**  
S3\_Table.docx

1 **Opportunities to sustain a multi-country quality of care network: lessons on the actions of**  
2 **four countries Bangladesh, Ethiopia, Malawi, and Uganda**

3

4 **Authors:** Seblewengel Lemma<sup>1\*</sup>, Callie Daniels-Howell<sup>2</sup>, Asebe Amenu Tufa<sup>3</sup>, Mithun Sarker<sup>4</sup>,  
5 Kohenour Akter<sup>4</sup>, Catherine Nakidde<sup>5</sup>, Gloria Seruwagi<sup>5</sup>, Albert Dube<sup>6</sup>, Kondwani Mwandira<sup>6</sup>,  
6 The QCN Evaluation group, Desalegn Bekele Taye<sup>7</sup>, Mike English<sup>8</sup>, Yusra Ribhi Shawar<sup>9</sup>,  
7 Kasonde Mwaba<sup>2</sup>, Nehla Djellouli<sup>2</sup>, Tim Colbourn<sup>2</sup>, Tanya Marchant<sup>1</sup>

8

9 **Affiliation**

10 <sup>1</sup> **Department of Disease Control, London School of Hygiene & Tropical Medicine, based in**  
11 **Ethiopia**

12 <sup>2</sup> **Institute for Global Health, University College London, UK**

13 <sup>3</sup> **Ethiopian Public Health Institute, Addis Ababa, Ethiopia**

14 <sup>4</sup> **Perinatal Care Project, Diabetic Association of Bangladesh, Dhaka, Bangladesh**

15 <sup>5</sup> **School of Public Health, Makerere University, Kampala, Uganda**

16 <sup>6</sup> **Parent and Child Health Initiative PACHI, Lilongwe, Malawi**

17 <sup>7</sup> **Ministry of Health, Health Service Quality Directorate, Addis Ababa, Ethiopia**

18 <sup>8</sup> **Centre for Tropical Medicine and Global Health, University of Oxford, Oxford, UK**

19 <sup>9</sup> **Bloomberg School of Public Health and Paul H. Nitze School of Advanced International**  
20 **Studies, John Hopkins University, Baltimore, USA**

21 **\*Corresponding author: Seblewengel Lemma**

22 [Seblewengel.Abreham@lshtm.ac.uk](mailto:Seblewengel.Abreham@lshtm.ac.uk)

23

24 **Abstract**

25 The Quality of Care Network (QCN) is a global initiative that was established in 2017 under  
26 the leadership of WHO in 11 low-and- middle income countries to improve maternal,  
27 newborn, and child health. The vision was that the Quality of Care Network would be  
28 embedded within member countries and continued beyond the initial implementation  
29 period: that the Network would be sustained. This paper investigated the experience of  
30 actions taken to sustain QCN in four Network countries (Bangladesh, Ethiopia, Malawi, and  
31 Uganda) and reports on lessons learned. Multiple iterative rounds of data collection were  
32 conducted through qualitative interviews with global and national stakeholders, and non-  
33 participatory observation of health facilities and meetings. A total of 241 interviews, 42  
34 facility and four meeting observations were carried out. We conducted a thematic analysis  
35 of all data using a framework approach that defined six critical actions that can be taken to  
36 promote sustainability. The analysis revealed that these critical actions were present with  
37 varying degrees in each of the four countries. Although vulnerabilities were observed, there  
38 was good evidence to support that actions were taken to institutionalize the innovation  
39 within the health system, to motivate micro-level actors, plan opportunities for reflection  
40 and adaptation from the outset, and to support strong government ownership. Two actions  
41 were largely absent and weakened confidence in future sustainability: managing financial  
42 uncertainties and fostering community ownership.

43 Evidence from four countries suggested that the QCN model would not be sustained in its  
44 original format, largely because of financial vulnerability and insufficient time to embed the  
45 innovation at the sub-national level. But especially the efforts made to institutionalize the

46 innovation in existing systems meant that some characteristics of QCN may be carried  
47 forward within broader government quality improvement initiatives.

48 **Key Words:** government ownership, institutionalization, community engagement, adoption,  
49 financial sustainability, quality of care, Network, maternal and newborn health, Bangladesh,  
50 Ethiopia, Malawi, Uganda

51

52 **Introduction**

53 The Quality of Care Network (QCN) is a global initiative that was established in 2017,  
54 motivated by the slow progress of countries in reducing maternal and newborn mortality,  
55 especially from preventable causes[1]. Evidence on the lack of equitable access to high  
56 quality health services for mothers, newborn and children [2] prompted the publication of  
57 standards and guidelines that promote high quality care [3,4]. Support for country-driven  
58 action plans for sustainable, high-quality care was recognised as a gap. Under the leadership  
59 of the World Health Organization (WHO), QCN was established to address that gap, with  
60 eleven participating Network countries namely Bangladesh, Côte d'Ivoire, Ethiopia, Ghana,  
61 India, Kenya, Malawi, Nigeria, Sierra Leone, Uganda, and the United Republic of Tanzania. In  
62 addition to these country governments and the WHO, QCN also encompassed  
63 implementing, technical and donor partner organisations. Together these countries and  
64 partners created a platform for learning to understand how to implement and sustain  
65 quality of care initiatives at national and sub-national levels [1]. This paper concludes the  
66 collection of papers to examine the performance of QCN, focusing on four Network  
67 countries: Bangladesh, Ethiopia, Malawi, and Uganda (Supplement 1). Here, we focused on  
68 the sustainability of the Network after five years of development and implementation.  
69 Despite its importance, the concept of sustainability is not yet well defined and there is  
70 inadequate effort to measure sustainability of innovations [5–7]. In this paper we take  
71 sustainability of health programs to mean the continuity of a program after the  
72 implementation phase [5]. It is important that this continuity be planned alongside program  
73 implementation in order for communities to reap the long term benefit of interventions  
74 [8,5,9]. Without planning for sustainability, externally funded innovations that do not have

75 strong government ownership are likely to lose momentum and cease to function when the  
76 funding agency withdraws or stops its support [9–11].

77 In an attempt to understand and potentially pre-empt this, studies have tried to identify the  
78 factors affecting sustainability and scaleup [5,7,10–14]. Building from these,  
79 Wickremasinghe and colleagues refined and summarized six actions that a donor funded  
80 innovation can implement to promote sustainability. These actions are (1) planning  
81 opportunities for reflection and adaptation from the outset (to ensure that innovations are  
82 fit for purpose through continuous engagement with government, and relevant  
83 stakeholders); (2) supporting strong government ownership with a plan for a phased  
84 transition of responsibilities as external partners withdraw (to ensure government support  
85 for and commitment to current and future implementation success); (3) motivating micro-  
86 level actors (to ensure that the needs and gaps of local level actors are understood such that  
87 they are enabled to engage and implement the innovation. In this paper, micro-level actors  
88 are health care workers and the supporting team at the lower level of the health system);  
89 (4) institutionalizing the innovation within the health system (to ensure that implementation  
90 is embedded within existing systems to enhance ownership, efficiency and reduce  
91 duplication); (5) managing financial uncertainties (to ensure financial commitment from  
92 governments such that innovation costs are included in the government budget plan); and  
93 (6) fostering community ownership (to ensure that community groups, for example clients  
94 of the health service or community groups, have the opportunity to catalyse the continuity  
95 of the innovation through advocacy and ensure accountability in the implementation of the  
96 innovation [10].

97 Here we report on the presence or absence of these actions in the context of QCN  
98 implementation, reflecting on how the potential for Network sustainability in four countries  
99 was affected.

#### 100 **Method**

101 This analysis was part of the multi-country evaluation of QCN, the methods of which are  
102 reported in our common methods supplement for our QCN Evaluation collection of papers  
103 (Supplement 2). Key aspects of the methods in relation to this paper are summarized here.

#### 104 **Study setting:**

105 The study was conducted in four QCN countries, namely Bangladesh, Ethiopia, Malawi, and  
106 Uganda; the study was started in 2018 except in Ethiopia that joined the study in 2019. An  
107 overview of key country characteristics is provided in Table 1.

108 *Bangladesh:* Maternal, newborn and child health (MNCH) is a priority agenda for Bangladesh  
109 with a population of more than 165 million [15]. According to the national health,  
110 population, and nutrition sector plan for the year 2017-2022, the government of Bangladesh  
111 has striven to improve the health of mothers and newborns through making home delivery  
112 safe, improving access to and utilization of emergency obstetric services, and improving  
113 access to newborn and child health care at the lower level of the health system [16]. Since  
114 2017, the government of Bangladesh with implementing partners launched the QCN; it  
115 currently has 28 learning districts out of 62 districts, where Quality Improvement (QI)  
116 activities have been implemented (Table 1).

117 *Ethiopia:* The second most-populous country in Africa, Ethiopia achieved its Millennium  
118 Development Goals (MDGs) for maternal and child health [17]. There have been a number

119 of government-led initiatives that explicitly address quality improvement and most recently,  
120 the Ministry of Health (MOH) adopted the national maternal and newborn quality of care  
121 roadmap for the year 2017-2020 [18]. This roadmap closely aligns with QCN activities which  
122 have been implemented in 14 learning districts out of 770 districts [19].

123 *Malawi:* Malawi is less populous compared to the other case study countries [20] (Table 1).  
124 Following its success in achieving its MDG target for child health, the MOH in Malawi  
125 engaged in initiatives that aimed to improve the health of mothers and newborns. The  
126 country established the Quality Management Directorate (QMD) within the MOH to  
127 improve service quality, addressed quality of service in its Health Sector Strategic Plan  
128 (HSSP-II) and developed its National Quality Policy and Strategy [21]. The MOH along with its  
129 partners have been implementing QI interventions in six learning districts out of 28 total  
130 districts in the country.

131 *Uganda:* Uganda with a population size of more than 47 million[22] is also striving to  
132 improve quality of health service provision to improve the health of mothers and newborns.  
133 Uganda's adoption of various components of quality in healthcare dates back to 1994 [23]  
134 initially driven by quality management interventions in HIV/AIDS, TB and malaria. In the  
135 recent past, the national standards, guidelines, and policies on maternal and newborn  
136 health (MNH) quality of care (QoC) as well as the health sector QI framework and health  
137 sector strategic plan 2015/16–2019/20 have been developed. The MOH has begun to  
138 implement QI interventions in six learning districts out of 111 total districts in the country  
139 [24].

140



141 **Table 1: Demographic and mortality characteristics for the four case study countries**

| Characteristics                                   | Bangladesh | Ethiopia | Malawi | Uganda |
|---------------------------------------------------|------------|----------|--------|--------|
| Total population size (million) <sup>1</sup>      | 166.3      | 117.9    | 19.6   | 47.1   |
| Total number of districts                         | 64         | 832      | 28     | 136    |
| Maternal Mortality Ratio per 100,000 <sup>2</sup> | 173        | 401      | 349    | 336    |
| Under 5 Mortality Rate per1000 <sup>3</sup>       | 29.3       | 59       | 59.1   | 58.4   |
| Neonatal Mortality rate per 1000 <sup>4</sup>     | 17         | 33       | 19     | 19     |
| Date launched QCN                                 | 2017       | 2017     | 2017   | 2017   |
| Number of QCN learning districts                  | 28         | 14       | 6      | 6      |
| Number of QCN learning facilities                 | 298        | 48       | 25     | 18     |

142 <sup>1</sup> Population size from World Bank 2021 <https://data.worldbank.org/indicator>[17,20,22,15]

143 <sup>2</sup> Bangladesh, Ethiopia, and Malawi MMR estimates from World Bank 2017[25,26]; Uganda  
144 from UDHS2016[27]

145 <sup>3</sup> Under 5 MR Bangladesh, Malawi and Uganda(global age -sex-specific fertility and  
146 mortality rate 2019) [28]; Ethiopia (Mini-DHS 2019)[29]

147 <sup>4</sup>NMR Ethiopia (Mini-DHS 2019), UNICEF DATA (2020) Bangladesh, Malawi and Uganda  
148 [25,26,29,30]

149

150 **Design:**

151 To explore the actions taken by the QCN actors that affect the potential for sustainability, a  
152 thematic analysis [31] of qualitative interview data and observations from the participating  
153 four countries and from interviews with global-level actors was conducted.

154 **Data Collection:**

155 ~~For the purpose of this analysis, two data collection sources were methods accessed were~~  
156 ~~applied~~ across the four countries (Table 2), and described below.

157 *Semi-structured interviews*

158 First, semi-structured qualitative interviews with national (n=122) and sub-national (107)  
159 level Network members and key stakeholders were conducted. Several iterative rounds of  
160 interviews were conducted in each country, typically at least six months apart, to capture (a)

161 changes in how the Network was operating, (ii) views pertaining to Network activities at the  
 162 time of interview, and (iii) follow-up on emerging findings from the previous round. The  
 163 participants were recruited purposively by identifying MOH and partner organizations  
 164 involved in QCN who could provide rich information about the Network (Table 2).

165 **Table 2: Qualitative interviews and health facility observations completed, by time, in**  
 166 **each country.**

| Case-study Country | Data collection dates   | National interviewee (n) | Sub-national Interviewee (n) | Facility Observation (n) |
|--------------------|-------------------------|--------------------------|------------------------------|--------------------------|
| Bangladesh         | 1 (Oct 2019 – Mar 2020) | 13                       | 7                            | 3                        |
|                    | 2 (Oct 2020 – Jan 2021) | 14                       | 11                           | 0                        |
|                    | 3 (May 2021 – Sep 2021) | 10                       | 12                           | 4                        |
|                    | 4 (Jan 2022 – Mar 2022) | 8                        | 0                            | 0                        |
| Ethiopia           | 1 (Jan 2021– Mar 2021)  | 8                        | 11                           | 4                        |
|                    | 2 (Nov 2021 – Dec 2021) | 10                       | 11                           | 3                        |
| Malawi             | 1 (Oct 2019 – Mar 2020) | 7                        | 12                           | 4                        |
|                    | 2 (Nov 2020 – Jan 2021) | 10                       | 7                            | 4                        |
|                    | 3 (Aug 2021 – Nov 2021) | 9                        | 7                            | 4                        |
|                    | 4 (Mar 2022)            | 2                        | 3                            | 0                        |
| Uganda             | 1 (Nov 2020 – Mar 2021) | 7                        | 13                           | 4                        |
|                    | 2 (Jun 2021 – Sep 2021) | 12                       | 8                            | 4                        |
|                    | 3 (Feb 2022 – Mar 2022) | 10                       | 5                            | 4                        |

167  
 168 Concurrently, semi-structured interviews were also conducted with QCN global actors (n=7  
 169 in Mar-2021 and n=14 during Nov-2021–Feb-2022). [The number of interviews at each](#)  
 170 [settingh was based on having suffiecent information saturation to answer our research](#)  
 171 [questions.](#) These interviews explored views on attributes of QCN and its operational  
 172 strategy and performance that might affect the sustainability of QCN, among other things  
 173 (Supplement 2).

174 *Non-participant observations*

175 Second, non-participant observations were conducted. In QCN health facilities, these were  
176 conducted via visits to two well and two least performing QCN health facilities in each case  
177 study country in two to three iterative rounds (Table 2). Well and least performing QCN  
178 health facilities were purposively selected through discussion with key stakeholders and  
179 review of facility-level maternal and newborn health outcome and other quality of care data  
180 (e.g., those used in national schemes). During these facility observations, structured  
181 templates were used to capture key processes relevant to the focus of the Network in each  
182 country, as well as unstructured notes. In addition, non-participant observations of key  
183 national-level and district level meetings were conducted during which processes and  
184 priority discussion topics were captured through unstructured notes. These meetings were  
185 usually organized by national level actors such as MOH and the schedule and purpose of the  
186 meeting was communicated by the host or during partner interviews. Finally, one global  
187 level QCN meeting was observed during the study period.

188 **Analysis:**

189 We performed a thematic analysis of the qualitative interviews and observations. A  
190 framework approach[32] was used to analyse the data based on a priori themes around six  
191 critical actions summarised by Wickremasinghe and others to define the actions that actors  
192 at different levels can take to help sustain innovations (table 3). We developed a matrix  
193 based on the themes, and codes that fall under each theme were assigned (supplement 3).  
194 All the co-authors reviewed and approved the matrix. Then the data was charted into the  
195 matrix for each country including the quotes that represent the summary data. We analysed  
196 and interpreted the data for each country first and after receiving feedback from each  
197 country data lead, the results were further analysed and interpreted, identifying similarities

198 and differences across countries and results were presented using the six sustainability  
 199 actions. We defined community as patients, clients of the health service, families or  
 200 members of local community who have stake in the health service provision.

201 Table 3: Six critical actions to help sustain innovations [10]

| # | Critical action                                                      | Rationale                                                                                                                                                                                                                                    |
|---|----------------------------------------------------------------------|----------------------------------------------------------------------------------------------------------------------------------------------------------------------------------------------------------------------------------------------|
| 1 | Planning opportunities for reflection and adaptation from the outset | Building in the expectation that there will be a need to continuously learn, reflect and adapt processes can help innovations be fit for purpose in the real world                                                                           |
| 2 | Strong government ownership                                          | Enabling government leadership in planning, inception and implementation strengthens the potential for commitment to, and responsibility for, innovations in the longer term                                                                 |
| 3 | Motivating micro-level actors                                        | Consideration of the needs and preferences of local-level implementers is essential for most innovations                                                                                                                                     |
| 4 | Institutionalizing the innovation within the health system           | Integration of processes (eg supervision, supply chain, data) within existing systems promotes ownership, reduces duplication, improves efficiency                                                                                           |
| 5 | Managing financial uncertainties                                     | Seeking sustained financial commitment from government, e.g. adding innovation costs to strategic plans and budgets, works alongside institutionalization and can help to minimise the impact of system shocks, e.g. a change in government. |
| 6 | Fostering community ownership                                        | Community groups can be important advocates for the continuation of innovations and hold leaders to account                                                                                                                                  |

202

203 **Ethics**

204 All data collection was conducted after obtaining informed-written consent, including  
 205 separate consent for tape recording. Patients' privacy was respected during hospital  
 206 observations. Our study didn't include minors as study participants. All data is confidential  
 207 and anonymised. Ethical approval was obtained from the Research Ethics Committee at

208 University College London (3433/003); institutional review boards in Bangladesh, BADAS  
209 Ethical Review Committee (ref: BADAS-ERC/EC/19/00274), Ethiopian Public Health Institute  
210 Institutional Review Board (ref: EPHI-IRB-240-2020), National Health Sciences Research  
211 Committee in Malawi (ref: 19/03/2264) and Uganda Makerere University School of Public  
212 Health- Higher degrees Research Ethics Committee in Uganda (ref: Protocol 869)  
213

214 **Results**

215 Results are synthesized across the experience of the learning districts and health system of  
 216 four QCN countries. We draw on the evidence described in Table 2, in addition to the  
 217 interviews and observations with global level actors to identify whether each action was  
 218 present and how it influenced the potential for Network sustainability at the scale it had  
 219 been implemented at during this investigation. To give a snapshot of experience by country,  
 220 we also present a high-level summary of these actions by country (Table 4). Overall, the  
 221 evidence from Bangladesh suggested that all sustainability actions were present during QCN  
 222 implementation to a certain degree. Other countries experienced more limited engagement  
 223 across the set of actions, especially apparent around managing financial uncertainty and  
 224 fostering community engagement.

225 **Table 4: Status of the sustainability actions in the four QCN countries**

| Sustainability actions                                         | Bangladesh | Ethiopia | Malawi | Uganda |
|----------------------------------------------------------------|------------|----------|--------|--------|
| 1. Planning opportunities for reflection and adaptation        | Green      | Green    | Yellow | Yellow |
| 2. Government ownership with a plan for a phased transition    | Yellow     | Yellow   | Yellow | Yellow |
| 3. Motivating micro-level actors                               | Green      | Green    | Green  | Green  |
| 4. Institutionalizing the innovation within the health system, | Yellow     | Yellow   | Yellow | Yellow |
| 5. Managing financial Uncertainties                            | Yellow     | Red      | Red    | Red    |
| 6. Fostering community engagement                              | Yellow     | Red      | Yellow | Red    |

226 **\*Green** represents the weight of evidence suggest the presence of the action on multiple  
 227 accounts, if not all. **Yellow** represents that evidence indicates the action to be present to  
 228 some degree, but with some vulnerability or weakness. **Red** represents there is no evidence  
 229 in the data to indicate the action exists.

230

231 **1. Planning opportunities for reflection and adaptation**

232 All respondent types interviewed reported that opportunities for planning, reflection and  
233 adaptation were embedded in the Network approach at the global, national, and sub-  
234 national levels, although some vulnerability was described in Malawi and Uganda.

235 At the global level, between countries, respondents recalled the importance of holding  
236 repeat, joint international meetings with global partners, held in Malawi in 2017, Tanzania  
237 in 2018, and Ethiopia in 2019. These meetings promoted the importance of country  
238 engagement with the Network and encouraged learning. A UNICEF respondent working in  
239 Bangladesh noted:

240 *“But I was in that [QCN] meeting along with the government .... the ministry agreed, and the*  
241 *team participated in that Malawi workshop. .... we had highest policy level commitment to*  
242 *participant in the QCN network”* ([Implementing Partner- National-Bangladesh Round 1-](#)  
243 [BGD-Partner-01](#)).

244 However, some respondents commented that there was limited follow-up and support from  
245 the global actors to see if the learning at the global level was adopted at the national level.

246 At the national level, respondents acknowledged opportunities for reflection and adaptation  
247 from the outset in the form of joint consultative meetings and joint assessments. During  
248 these meetings, activities were planned, learning sites selected, and then partner  
249 organisations contributions discussed and coordinated. This type of national level  
250 engagement was particularly strongly reported in Ethiopia, including the MOH and partner  
251 organizations organising a joint quality summit in the country.

252 In all countries there was also evidence that the generic quality of care standards from the  
253 WHO Quality of Care framework were adapted to meet the needs of government quality  
254 management directorates. A respondent capitalized on the importance of contextualizing  
255 interventions at the country level as follows:

256 *"...economically we are different, the setups of the government are different. For instance,*  
257 *we take Malawi, and we compare it with South Africa its [implementation] will be totally*  
258 *different but the standards will be the same."* ([Government-Local case 1-Malawi round](#)

259 [2Round2-Local-MWI-Site-01-Gov't-01-F](#))

260 Finally, at sub-national levels in all countries, the restriction of implementation to a small  
261 number of learning health facilities, with the intention to foster learning for future scale-up,  
262 automatically implied built in opportunity for reflection and adaptation. These learning sites  
263 also had opportunities for reflection during the learning forums where health facilities with  
264 better performance in QI work shared their experience. However, linkages between  
265 reflective learning at national and sub-national levels did not always lead to adaptation in  
266 practice, for example in Uganda and Malawi where QCN structures at the sub-national and  
267 local level were reported to be less strong respectively.

268 *"At the district level, they have known their part in the Network but at facility level we don't*  
269 *really mention the Network. We mention it during training, but they are not that conscious*  
270 *about it, although they know that there are facilities within the district that are also*  
271 *implementing and that they need learn and share and thus should hold meetings every*  
272 *quarter to come together and learn from each other. The importance of the Network at the*  
273 *district level is not so high, it is more at the national level."* ([Government-National-Uganda](#)

274 [round 2Round 2-National-UGA-MOH-01](#))





276 **2. Strong government ownership with a plan for a phased transition**

277 All countries demonstrated strong ownership of the QCN, at least in terms of political and  
278 normative commitments. However, none of the countries had a plan for transition when  
279 QCN partners had completed their contract of implementation.

280 At the global level, there was a push for country governments to take ownership of their  
281 respective QI activity. WHO provided technical support, developing guidelines and  
282 frameworks such as the LALA (leadership, action, learning and accountability) framework  
283 which facilitated the implementation and monitoring of the Network activity at national and  
284 sub-national levels. WHO's approach of leadership was also appreciated as being non-  
285 prescriptive, actively seeking buy-in and ownership from partners and country governments.

286 At the national level, the MOH of each country took ownership of the QCN initiative and  
287 enlisted partner support. In Ethiopia, QCN was reported as the Ministry's flagship program,  
288 creating technical committees and organizing partners' efforts. Similarly, in Bangladesh a  
289 government academic institution, National Institute of Preventive and Social Medicine  
290 (NIPSOM) supported MoH in the implementation of the Network, together with other  
291 partners.

292 *"The Government has many initiatives especially in the context of quality of care. It's*  
293 *basically a government program."* ([Implementing Partner-National-Bangladesh round](#)  
294 [1National\\_BGD\\_SAVE\\_01](#)).

295 However, a vulnerability that was reported across countries was the fact that the national  
296 MOH quality directorates worked in isolation; it was thought that better integration of  
297 quality across directorates could further strengthen ownership of the Network.

298  
299 *"I think one other problem we have in higher offices in the ministry is that programs are*  
300 *working in isolation. And we know worldwide that we cannot achieve quality, or we cannot*  
301 *make quality improvement if we try to work as individuals. So, the departments need to*  
302 *come together and be seen of the ground together and move forward"* ([Health facility](#)  
303 [worker-Local case 4-Malawi round 3Round3-Local-MWI-Site-04-HCW-02-F](#))

304 Between countries, government ownership was not uniform at the sub-national level. In  
305 Malawi, the structure that was established at the national level went to the lower-level  
306 health system, down to the community. In Bangladesh, the Civil Surgeons took leadership of  
307 the QI activities at sub-national level. But in Ethiopia and Uganda government ownership  
308 was relatively weaker at the sub national level. In Uganda, the system didn't cascade down  
309 to the lower level of the health system and in Ethiopia a lack of commitment was observed  
310 from the regional health system. A respondent from Ethiopia commented:

311 *"We have no role in the Network so there cannot be conflict of interest. We do mentorship &*  
312 *coaching at three hospitals. Other than that, the structure is not stretched down. At the*  
313 *office level, we are not required to provide support. .... to be frank the plan is not ours; it is*  
314 *MOH's plan."* ([Government-Local-Ethiopia Round 1Round1-ETH-Local-RHB-08](#))

315 Although the MOH of the respective countries took ownership of the Network, and activities  
316 took place within existing structures, a particular vulnerability was that implementation was  
317 usually facilitated by the implementing partners through individual projects.

318 *"... regionalized support like UNICEF is already in certain districts, so they have been*  
319 *supporting that work in their districts. That's how it's been working and then Government*  
320 *sort of takes the middle piece where if there is capacity building, they support that, although*

321 *other partners have also done their part in capacity building and trainings within their*  
322 *budgets.”* ([Government-National-Uganda round 2](#)~~Round 2-National-UGA-Gov't 01~~)

323 While the strong ownership and coordination at national level was positive, the more  
324 fragmented ownership sub-nationally, and the approach of partners implementing activities  
325 on a project basis, limited the opportunity for a phased transition of responsibilities in all  
326 countries. Some partners did not have a vision for long term engagement, beyond their  
327 current funding, and sub-national leaders did not feel confident that they would have the  
328 resources to implement without partner support.

329 *“...you know some other partners just come and then disappear. So sometime other partners*  
330 *are inactive, and some partners will come and say, I think our funding has finished. And*  
331 *when their funding has finished they just disappear, and they even don't say anything and*  
332 *this has been a problem”* ([Government-Local case 2-Malawi round 2](#)~~Round2-Local-MWI-Site~~  
333 ~~02-MoH-03-F~~)

### 334 **3. Motivating micro-level actors**

335 All four countries employed various mechanisms to motivate the healthcare workers and  
336 those supporting the work of health facilities at a grass root level in relation to the QCN  
337 work. An incentive mechanism in the form of small funding or grants for health facilities was  
338 reported in Bangladesh, Ethiopia, and Uganda as part of the QCN intervention. This  
339 incentive approach was appreciated by the respondents because it created an enabling  
340 environment for the health workers to be innovative in identifying, prioritizing, and solving  
341 problems within their health facility. The incentive was also given to their health facility as a  
342 form of reward for the best performer in quality service provision.

343 " They [facility workers] come [to a fair] and participate in a competition. Whose  
344 performance is the best according to the report? An award is given according to the [facility]  
345 performance. It is given facility wise and inter-district wise." (Government-Local case 1-  
346 Bangladesh round 1~~Round 1 Local BDG Site 01 Gov't 02~~)

347 In addition, several respondents confirmed that the knowledge and skills gained through the  
348 extensive training linked to the Network activities further fostered motivation.

349 "Without having knowledge, there is no motivation to do the work. Now when they realized  
350 that they could do better, now they do the work with more enthusiasm and do the work with  
351 more quality." (Government-Local case 1-Bangladesh round 1).

352 "The activities[training] are nice because it fills the skill gaps. As you know even though most  
353 of our workers have theoretical knowledge they lack skills. ....In the process of filling the skill  
354 gaps indicators are presented, detail technical works are also included. Because of this, I am  
355 interested in the activities. These are technical duties that help professionals to follow every  
356 step to provide health services." (Government-Local-Ethiopia round 1)

357 Nonetheless, despite the positive comments on QCN actions to motivate micro-level actors,  
358 two areas of concern were broadly noted. First that while such incentives were observed to  
359 positively motivate micro-level actors during this phase of QCN, the use of financial  
360 incentives for individuals might not be sustainable in the longer term or if QCN activities  
361 were scaled up beyond the current learning areas. And second, if deficiencies in health  
362 facility structural quality persisted into the future, or if career progression for health  
363 workers was limited, then the QCN actions to motivate the workforce would be weakened.

Formatted: Font: (Default) +Body (Calibri), Italic

Formatted: Font: Not Italic

Formatted: Font: Not Italic

364 *“...there are a lot of demotivators yah? Maybe career paths. Frustrations also come with*  
365 *small issues like infrastructure in which the staff are working in.”* ([Government-National-](#)  
366 [Malawi round 2](#)~~Round2-National-MWI-Gov't-04-F~~)

#### 367 **4. Institutionalizing the innovation within the health system**

368 Implementers in all four countries were keen to work within the existing health system, to  
369 avoid creating parallel systems, and to enable the physical environment for QI through  
370 investment in existing infrastructure, job aids and guidelines. In each country, Network  
371 activities were located within a designated government unit or department that was  
372 responsible for health care quality. For example, in Ethiopia, QCN had a designated person  
373 at each level of the health system, and activities were coordinated as part of the national  
374 plan, with some variation at sub-national levels. In Malawian hospitals, Network activities  
375 were integrated in Quality Management Units, working through pre-existing Quality  
376 Improvement Support Teams. However, the institutionalization of QI in Malawi was not  
377 perceived to be adequate and respondents suggested to have QI as part of the tertiary level  
378 education, so that health workers would have adequate knowledge and understanding of QI  
379 when they joined the workforce.

380 *“My best bet would be to have as many officers, as many frontline workers playing in quality*  
381 *...We should be really thinking about... if graduates are coming straight from college, they*  
382 *should already know that quality is built in every clinical program and that it's not something*  
383 *that is separate, but it is part of that clinical training. So, the training in MNH, then QI is part*  
384 *of it because quality is eventually what we need... that's how we serve a customer.”*  
385 ([Implementing partner-National-Malawi round 3](#)~~Round3-National-MWI-Maikhanda-02-F~~)

386 Learning forums and training were thought to play an important role in institutionalizing QI  
387 in the health system. The learning forums allowed transfer of knowledge and skill within  
388 and across health facilities and these were shared by health workers and managers with  
389 their colleagues and remained in the health system. As was the advocacy work that partners  
390 carried out to raise awareness about the initiative. An example was reported from Ethiopia  
391 of a region that had started to prepare a quality improvement bulletin to give more voice to  
392 the Network idea.

393 However, four vulnerabilities emerged that limited institutionalisation efforts. First, the  
394 consequences of losing partner support at the end of their funded project period was  
395 described as a problem that weakened the Network as MOH struggled to fill the gap and  
396 maintain momentum.

397 *"...what scares us most is the question 'If the partners left, would the initiative continue?'.  
398 They are very supportive of QI projects. As I said if you go to the district level and observe  
399 you may observe many QI projects. This is due to the partner organizations. ... Sometimes I  
400 wonder if the program only lasts as long as those partners exist. Perhaps if they left, I am not  
401 sure about the continuity. But for now, it is good."* ([Government-National- Ethiopia round](#)  
402 [1Round1-ETH-National-Gov't-02](#))

403 Second, respondents mentioned that partner priorities did not always perfectly align with  
404 the real-world needs in the country, especially at sub-national levels where de-centralised  
405 decision making was needed. As reported in Uganda, multiple partners invested on the  
406 same activity when it was known that it was not a priority for the district. A respondent  
407 from Malawi also described existing misalignment between partner and government  
408 priorities as follow:

409 *“the challenge with our partners when they are coming into they have their own objectives*  
410 *to achieve that may be line with what we want but they are coming in the name of quality*  
411 *but not on the specifics that we are targeting so thus what I can say over that one”*

412 ([Government-Local case 1- Malawi round 2](#))~~Round2-Local-MWI-Site-01-MoH-01-F~~

413 Third, some respondents reported fragmentation of implementation according to the  
414 presence of different implementing partners who had different organizational missions and  
415 vision. This was emphasised by respondents from Bangladesh, where the implementing  
416 partners divided the implementing areas among themselves, but activities carried out  
417 according to their own pace, with different level of intensity.

418 And finally, the COVID 19 pandemic shifted both emphasis and resources away from the  
419 quality improvement activities and tested the strength and depth of institutionalization of  
420 the Network activities within the health system. A respondent from national implementing  
421 partner in Ethiopia reported that because of the COVID-19 outbreak, their organization had  
422 to close all its program including QCN and transferred their budget to COVID-19 response.

## 423 **5. Managing financial uncertainties**

424 Initial Network initiatives in all countries were heavily supported by implementing  
425 organizations through external funding. As seen at the global level, the funding for QCN  
426 came primarily from the Bill and Melinda Gates foundation (BMGF) and USAID; the  
427 contribution of WHO through its staff time was also noted. At national level, however, some  
428 progress of financial commitment from government was observed, particularly for  
429 coordination efforts, though less so for implementation, which was mostly still dependent  
430 on partner organisation budgets. In Ethiopia and Uganda, there was some evidence of  
431 government financial support or budget allocated to QI. And in Bangladesh, several



432 respondents noted the government’s long-standing commitment to achieving universal  
433 health coverage, consistent with the goals of the Network. Here, where QCN was observed  
434 to be particularly well assimilated in government plans, it was impossible to see Network  
435 activities separately from government QI actions, creating a strong belief that the  
436 government would manage financial uncertainties, as exemplified by a respondent from a  
437 partner organization:

438 *“It’s a project that you are talking about, but we are not concerned about the time of QCN*  
439 *project because the quality improvement initiative that we are doing is part of the*  
440 *government plan, there is nothing with that QCN project. Even we don’t use this term QCN,*  
441 *so this is part of our sector programme. This is the way we are supporting; we are taking it*  
442 *forward as part of their operational plan and sector plan. And now they have developed the*  
443 *quality strategy and now we’ll develop the action plan, and they will go beyond 2022....”*

444 (~~Implementing partner-National- Bangladesh round 4Round4-National-BGD-Implementing~~  
445 ~~partner-01-F)~~

446 But other countries expressed concern about the continuity of QCN efforts in the absence of  
447 external funding. Although Ethiopia did try to manage interruption of funding when an  
448 individual support partner phased out by committing budget to QCN activities, this effort of  
449 the government was jeopardised by external shocks such as COVID 19.

450 Similarly in Malawi, a respondent commented about the fate of QCN in the absence of  
451 external funding:

452 *“But I find the issue to do with financing more of a cause for us to fail. This is because look at*  
453 *all the components of the health system and I find... well... I was trying at this particular time*  
454 *to think about the investments that have happened for example in Kasungu, as a learning*

455 *district. How much did government commit to the goal that we reduce the maternal*  
456 *mortality rate by fifty per cent in the implementing (of the project) in the nation and districts*  
457 *by 2022? If we are to be honest, success of every implementing district was dependant on*  
458 *the kind of and the flexibility of partners that are in the district.”* ([Implementing partner-](#)  
459 [National- Malawi round 3](#)~~Round3-National-MWI-implementing partner-01~~).

## 460 **6. Fostering community ownership and acceptance**

461 All four countries had a system for community engagement, but it was seldomly used for  
462 the purpose of the QCN except in Bangladesh and Malawi. Similarly, there was little  
463 emphasis on community engagement in relation to QCN at the global level, despite  
464 community empowerment being a central pillar of WHO’s theory of change for QCN.  
465 Community engagement was particularly strong in Bangladesh, perhaps reflecting the  
466 relatively strong health system there prior to QCN implementation. Community leaders  
467 supported QI work in hospitals and took part in monthly coordination meetings organized  
468 by the district leadership; members of the public participated in QI activities through  
469 volunteer groups and clubs; partner organizations established suggestion boxes, help desks,  
470 citizen charters and community score cards to promote community voice; and government  
471 created platforms for community meetings to advocate for quality improvement. All these  
472 initiatives were present prior to QCN but had been aligned and adapted for the same  
473 purpose. However, few said that the community engagement part is still a working progress  
474 and yet to be designed and implemented as part of the QCN work by their implementing  
475 organization.

476 *“...WHO has released a stakeholder and community engagement module. And from that*  
477 *module we have some ideas and some guidelines; how we should communicate with the*

478 community for this quality improvement. Right now we are in a process of developing the  
479 Bangladesh based context module based on that WHO module..." ([Implementing partner-  
480 National-Bangladesh round 4](#)~~Round4-National-BGD-partner-04~~)

481 In Malawi, community engagement was added as the ninth standard in the MNH QoC  
482 standards. A formal structure to link the community members with service providers in  
483 health facilities was established, called Health Centre Advisory Committee. This committee  
484 was responsible not only for promoting accountability but mobilized resources for the QI  
485 initiatives. Village Health Committees and Village Development Committees also played a  
486 key role in mobilizing resources.

487 "there is a feedback mechanism where like if clients are not satisfied with the services that  
488 they are receiving or maybe a certain injustice has happened they do complain to the  
489 ombudsman and their issues get resolved. The hospital ombudsman also conducts some exit  
490 interviews where they check the satisfaction level of the quality of services that are being  
491 offered at the facility. So at the end of the month, the HO produces an exit report on how  
492 many clients they interviewed, how many were not satisfied with the services and the  
493 reasons for lack of satisfaction and others things..." ([Government-National-Malawi round  
494 2](#)~~Round2-National-MWI-MoH-06~~)

495 However, not all agreed on the extent of community engagement in Malawi.

496 ".....it was found that standard nine (community engagement) is the one that is not being  
497 implemented in almost all the districts. There is a big challenge on the one that talks about  
498 community and accountability... so issues of score card is not done... so it's almost cut  
499 across..." ([Government-Local case 3-Malawi round 3](#)~~Round3-Local-MWI-Site-03-MoH-01-F~~)

500 Despite the existence of strong community engagement structures in Uganda and in  
501 Ethiopia (for example through the Health Extension Programme in Ethiopia), community  
502 involvement did not emerge as a strong component of Network activity. One participant  
503 reflected that this might have been an oversight that could subsequently be addressed.  
504 *“Then when we come to the stakeholders and community engagement, we are not doing so  
505 well, UNICEF has done some work to this business of community engagement using Village  
506 Health Teams [the lowest point of Uganda’s health system]. But there is a gap of not  
507 engaging the health unit management committees [HUMCs] which bridge the community  
508 with facilities.” (Implementing partner-National-Uganda round 1Round1-National UGA-  
509 implementing partner-03)*  
510

511 **Discussion**

512 Our analysis examined the presence of six critical actions to support sustainability of QCN in  
513 the limited number of implementation areas in four Network countries. Institutionalization  
514 of the innovation with the health system and motivating micro-level actors were found in all  
515 countries, while recognising that some vulnerability existed. There was also some evidence  
516 of actions taken to plan opportunities for reflection and adaptation from the outset and to  
517 support strong government ownership. However, these actions were stronger at national  
518 than subnational level. Two actions were largely absent and weakened confidence in future  
519 sustainability: managing financial uncertainties and fostering community ownership.

520 Institutionalization of QCN within existing systems was strong in all four countries, and  
521 particularly to the extent that QCN in Bangladesh and Ethiopia was recognized as part of the  
522 governments' QI initiative, not as a separate entity. The alignment of goals of QCN with  
523 country priorities and their desire to improve the health of mothers and newborn in all four  
524 countries positioned QCN as a favoured intervention. Building and sustaining institutional  
525 capability including the local capability was reported as a means to sustain a scale-up of an  
526 innovation [9,33]. However, we also witnessed that institutionalization could be affected in  
527 the presence of financial uncertainty as in Ethiopia, poor harmonization of effort among  
528 implementing partners as in Bangladesh, and suboptimal alignment of country needs with  
529 implementing partners objectives at sub-national level as in Uganda and Malawi.

530 All countries took essential steps in motivating micro-level actors, although the sub-optimal  
531 environment in which these actors worked sometimes operated against the motivating  
532 actions as reported elsewhere [34]. But QCN was regarded as a beneficial initiative for staff.  
533 The training and knowledge and skill sharing sessions were most appreciated sources of

534 motivation together with the financial incentives given to health facilities based on their  
535 performance in QI. In many low-and middle-income countries there is an insufficient  
536 number of health workforce, including in the case study countries [35]; actions to motivate  
537 health workers are important for retention in the health system [11,14]. Training was  
538 reported as a source of motivation for health workers in previous studies [36,37] as was  
539 improving the environment they operated in [34,36].

540 Opportunities for reflection and adaptation of QCN were embedded in the design with  
541 repeat learning forums at all levels. The fact that governments took the initiative to engage  
542 in conversations before embarking on QCN activity in all countries created a strong starting  
543 platform for country implementation. In addition, country commitment to global initiatives  
544 such as the SDGs created a fertile ground for QCN to act as a catalyst to achieve these global  
545 commitments. The learning forums and meetings that happened at the global, national, and  
546 sub-national level set the stage for country adaptation of QCN, crucial for accommodation  
547 of country specific contexts [11]. However, accountability for implementing learning was  
548 not optimal everywhere because of weak systems and realising opportunities for learning  
549 often relied on external support [38]. Further, more time, effort and engagement were  
550 needed at the local level to secure leadership commitment and resource.

551 There was strong government ownership of the QI initiative in all countries [39]. From the  
552 start, QCN was not rigidly prescribed by the global actors unlike many donor-funded  
553 interventions. But two areas of vulnerability included that government ownership did not  
554 extend to all levels of the health system [14,40]; and while there was confidence that QCN  
555 would continue to be a government priority going forward, none of the countries had a plan  
556 for phased transition from partner support to full government implementation. The lack of a

557 plan for phased transition had already affected the Ethiopia program as some of the  
558 implementing partners had already completed their contracted support.

559 Of the two actions observed to be less present, financial uncertainty limited the ability of  
560 the four countries to move forward in the absence of continuous support and none of the  
561 countries had a financial sustainability plan. This limitation necessarily challenges the  
562 question of the strength of ownership by country governments [10,13], but also challenges  
563 global partners to ensure that achieving financial security was central to the design. In  
564 Ethiopia and Uganda there were some attempts by the government to fill gaps in funding  
565 during the QCN implementation period. However, we didn't identify any plan laid out to  
566 manage the financial uncertainties, except the strong optimism from respondents in  
567 Bangladesh.

568 Finally, engaging the community as a sustainability action received relatively little attention,  
569 except in Bangladesh and Malawi where there was some evidence of community  
570 engagement to the extent of mobilizing domestic resources for the initiative. However, both  
571 Ethiopia and Uganda made little effort to utilize their already well-established community  
572 health system [41]. Other studies acknowledged the benefit of engaging the community in  
573 such innovative interventions to ensure community acceptance and its sustainability  
574 [10,11,14,42]. Defining community engagement or ownership in the context of QCN may be  
575 crucial to maximize gain from the community engagement process, especially in the  
576 countries where their roles in QCN was not yet defined [43].

577 Strengths and limitations of this study

578 This analysis triangulated data from key partners at the global, national, and sub-national  
579 level in the four case study countries that improved the credibility of our findings.

580 Important insights were observed about actions taken that promoted the sustainability of  
581 QCN. But the evaluation could only make inference in the context of implementation in a  
582 relatively small number of implementation districts, and over a relatively short period of  
583 implementation; it did not attempt to engage with sustainability at scale. Further, while  
584 national level participant meetings were observed, meetings at the district level were not  
585 included in the original plan: it is possible that this limited our understanding at the  
586 implementation level however, given the depth of information from individual interviews, it  
587 is unlikely to change our findings. The framework of six sustainability actions was a useful  
588 tool with which to examine whether and how the innovation could be sustained for the  
589 longer term, but some co-dependence was observed between actions such that, for  
590 example, positive remarks about government ownership and institutionalisation were made  
591 vulnerable by financial uncertainty.

## 592 **Conclusion**

593 The framework of six critical actions to promote sustainability was useful in revealing where  
594 progress was made and what more could be done to sustain improvements in MNH  
595 outcomes and quality of care. The innovation was observed to be relatively top-down, with  
596 the drive being strongest at global and national levels but with much work – and time -  
597 needed to embed QCN linked activities at the sub-national level. Crucially, it was revealed  
598 that the absence of deliberate action to address financial uncertainty was an obstacle to the  
599 sustainability of QCN. Nevertheless, the strong progress made to institutionalize some  
600 characteristics of QCN in existing government systems should be supported to avoid any  
601 stalling of progress.

## 602 **Acknowledgment**



603 We would like to thank all study respondents for their invaluable participation in the overall  
604 QCN evaluation. We also appreciate the participation of the QCN Evaluation Group, made  
605 of: Fatama Khatun, Abdul Kuddus, Kishwar Azad (BADAS-PCP Bangladesh), Gladson  
606 Monjeza, Racheal Magaletta, Zabvuta Moffolo, Charles Makwenda (Parent and Child Health  
607 Initiative, Malawi), Mary Kinney, Fidele Mukinda (independent researchers, South Africa),  
608 Will Payne, Jeremy Shiffman (Johns Hopkins University, USA), Hilda Namakula, Agnes  
609 Kyamulabi (Makerere University, Uganda) Anene Tesfa, Theodros Getachew, Geremew  
610 Gonfa (Ethiopia Public Health Institute, Ethiopia).

611

612

613

614

615

616

617 Reference

- 618 1 World Health Organization. The network for improving quality of care for maternal,  
619 newborn and child health: evolution, implementation and progress: 2017-2020 report.  
620 Geneva: : World Health Organization 2021.  
621 <https://apps.who.int/iris/handle/10665/343370> (accessed 10 Jan 2022).
- 622 2 Kruk ME, Gage AD, Joseph NT, et al. Mortality due to low-quality health systems in the  
623 universal health coverage era: a systematic analysis of amenable deaths in 137 countries.  
624 *The Lancet* 2018;**392**:2203–12. doi:10.1016/S0140-6736(18)31668-4
- 625 3 World Health Organization. Quality of care : a process for making strategic choices in  
626 health systems. 2006;:38.<https://apps.who.int/iris/handle/10665/43470> (accessed 10 Jan  
627 2022).
- 628 4 Quality health services: a planning guide. [https://www.who.int/publications-detail-  
629 redirect/9789240011632](https://www.who.int/publications-detail-redirect/9789240011632) (accessed 10 Jan 2022).
- 630 5 Hailemariam M, Bustos T, Montgomery B, et al. Evidence-based intervention  
631 sustainability strategies: a systematic review. *Implementation Sci* 2019;**14**:57.  
632 doi:10.1186/s13012-019-0910-6
- 633 6 Braithwaite J, Testa L, Lamprell G, et al. Built to last? The sustainability of health system  
634 improvements, interventions and change strategies: a study protocol for a systematic  
635 review. *BMJ Open* 2017;**7**:e018568. doi:10.1136/bmjopen-2017-018568
- 636 7 Marimuthu M, Paulose H. Emergence of Sustainability Based Approaches in Healthcare:  
637 Expanding Research and Practice. *Procedia - Social and Behavioral Sciences*  
638 2016;**224**:554–61. doi:10.1016/j.sbspro.2016.05.437
- 639 8 Pluye P, Potvin L, Denis J-L. Making public health programs last: conceptualizing  
640 sustainability. *Evaluation and Program Planning* 2004;**27**:121–33.  
641 doi:10.1016/j.evalprogplan.2004.01.001
- 642 9 Hirschhorn LR, Talbot JR, Irwin AC, et al. From scaling up to sustainability in HIV: potential  
643 lessons for moving forward. *Globalization and Health* 2013;**9**:57. doi:10.1186/1744-8603-  
644 9-57
- 645 10 Wickremasinghe D, Alkali Hamza Y, Umar N, et al. ‘A seamless transition’: how to  
646 sustain a community health worker scheme within the health system of Gombe state,  
647 northeast Nigeria. *Health Policy and Planning* 2021;**36**:1067–76.  
648 doi:10.1093/heapol/czab063
- 649 11 Spicer N, Berhanu D, Bhattacharya D, et al. “The stars seem aligned”: a qualitative  
650 study to understand the effects of context on scale-up of maternal and newborn health  
651 innovations in Ethiopia, India and Nigeria. *Globalization and Health* Published Online First:  
652 25 November 2016. doi:10.1186/S12992-016-0218-0

- 653 12 Barker PM, Reid A, Schall MW. A framework for scaling up health interventions:  
654 lessons from large-scale improvement initiatives in Africa. *Implementation Sci*  
655 2015;**11**:12. doi:10.1186/s13012-016-0374-x
- 656 13 Wickremasinghe D, Gautham M, Umar N, et al. "It's About the Idea Hitting the Bull's  
657 Eye": How Aid Effectiveness Can Catalyse the Scale-up of Health Innovations.  
658 *International Journal of Health Policy and Management* 2018;**7**:718–27.  
659 doi:10.15171/ijhpm.2018.08
- 660 14 Spicer N, Hamza YA, Berhanu D, et al. 'The development sector is a graveyard of pilot  
661 projects!' Six critical actions for externally funded implementers to foster scale-up of  
662 maternal and newborn health innovations in low and middle-income countries.  
663 *Globalization and Health* 2018;**14**:74. doi:10.1186/s12992-018-0389-y
- 664 15 Population, total - Bangladesh | Data.  
665 <https://data.worldbank.org/indicator/SP.POP.TOTL?locations=BD> (accessed 9 Apr 2022).
- 666 16 4th Health, Population and Nutrition Sector Programme (4th HPNSP) Operational  
667 Plan (OP), Maternal Neonatal Child and Adolescent Health (MNC&AH) (January 2017 -  
668 June 2022). [http://hospitaldghs.gov.bd/wp-content/uploads/2020/01/HSM\\_OP\\_2017-  
669 22.pdf](http://hospitaldghs.gov.bd/wp-content/uploads/2020/01/HSM_OP_2017-22.pdf) (accessed 26 Jul 2022).
- 670 17 Population, total - Ethiopia | Data.  
671 <https://data.worldbank.org/indicator/SP.POP.TOTL?locations=ET> (accessed 9 Apr 2022).
- 672 18 Health M of. National MNH Quality of Care Roadmap (2017/18-2019/2020).  
673 Published Online First: 1 July  
674 2017.<https://repository.iphce.org/xmlui/handle/123456789/738> (accessed 2 Apr 2022).
- 675 19 Ethiopia | Quality of Care Network. [https://www.qualityofcarenetwork.org/country-  
676 data/ethiopia](https://www.qualityofcarenetwork.org/country-data/ethiopia) (accessed 2 Apr 2022).
- 677 20 Population, total - Malawi | Data.  
678 <https://data.worldbank.org/indicator/SP.POP.TOTL?locations=MW> (accessed 9 Apr  
679 2022).
- 680 21 Government of Malawi. Health Sector Transformation Plan II.  
681 <https://www.health.gov.mw/index.php/78-demo/slides/199-hssp-2> (accessed 10 Aug  
682 2022).
- 683 22 Population, total - Uganda | Data.  
684 <https://data.worldbank.org/indicator/SP.POP.TOTL?locations=UG> (accessed 9 Apr 2022).
- 685 23 Ministry of Health [Uganda]. The Quality Improvement methods: A manual for  
686 health workers in Uganda. 2015.
- 687 24 Uganda | Quality of Care Network. [https://www.qualityofcarenetwork.org/country-  
688 data/uganda](https://www.qualityofcarenetwork.org/country-data/uganda) (accessed 2 Apr 2022).

- 689 25 Bangladesh (BGD) - Demographics, Health & Infant Mortality. UNICEF DATA.  
690 <https://data.unicef.org/country/bgd/> (accessed 9 Apr 2022).
- 691 26 Malawi (MWI) - Demographics, Health & Infant Mortality. UNICEF DATA.  
692 <https://data.unicef.org/country/mwi/> (accessed 9 Apr 2022).
- 693 27 Demographic Health Survey, Uganda.  
694 <https://dhsprogram.com/pubs/pdf/FR333/FR333.pdf> (accessed 15 Jul 2022).
- 695 28 Wang H, Abbas KM, Abbasifard M, et al. Global age-sex-specific fertility, mortality,  
696 healthy life expectancy (HALE), and population estimates in 204 countries and territories,  
697 1950–2019: a comprehensive demographic analysis for the Global Burden of Disease  
698 Study 2019. *The Lancet* 2020;**396**:1160–203. doi:10.1016/S0140-6736(20)30977-6
- 699 29 Ephi EPHI-, FMOH FM of H-, ICF. Ethiopia Mini Demographic and Health Survey 2019.  
700 Published Online First: 15 May 2021.[https://dhsprogram.com/publications/publication-](https://dhsprogram.com/publications/publication-FR363-DHS-Final-Reports.cfm)  
701 [FR363-DHS-Final-Reports.cfm](https://dhsprogram.com/publications/publication-FR363-DHS-Final-Reports.cfm) (accessed 2 Apr 2022).
- 702 30 Uganda (UGA) - Demographics, Health & Infant Mortality. UNICEF DATA.  
703 <https://data.unicef.org/country/uga/> (accessed 9 Apr 2022).
- 704 31 Castleberry A, Nolen A. Thematic analysis of qualitative research data: Is it as easy as  
705 it sounds? *Currents in Pharmacy Teaching and Learning* 2018;**10**:807–15.  
706 doi:10.1016/j.cptl.2018.03.019
- 707 32 World Health Organization. WHO community engagement framework for quality,  
708 people-centred and resilient health services. World Health Organization 2017.  
709 <https://apps.who.int/iris/handle/10665/259280> (accessed 9 Aug 2022).
- 710 33 Walugembe DR, Sibbald S, Le Ber MJ, et al. Sustainability of public health  
711 interventions: where are the gaps? *Health Research Policy and Systems* 2019;**17**:8.  
712 doi:10.1186/s12961-018-0405-y
- 713 34 Djellouli N, Mann S, Nambiar B, et al. Improving postpartum care delivery and uptake  
714 by implementing context-specific interventions in four countries in Africa: a realist  
715 evaluation of the Missed Opportunities in Maternal and Infant Health (MOMI) project.  
716 *BMJ Glob Health* 2017;**2**:e000408. doi:10.1136/bmjgh-2017-000408
- 717 35 World Health Organization. Global strategy on human resources for health:  
718 workforce 2030. Geneva: : World Health Organization 2016.  
719 <https://apps.who.int/iris/handle/10665/250368> (accessed 22 Nov 2022).
- 720 36 Willis-Shattuck M, Bidwell P, Thomas S, et al. Motivation and retention of health  
721 workers in developing countries: a systematic review. *BMC Health Services Research*  
722 2008;**8**:247. doi:10.1186/1472-6963-8-247
- 723 37 Momanyi GO, Adoyo MA, Mwangi EM, et al. Value of training on motivation among  
724 health workers in Narok County, Kenya. *Pan Afr Med J* 2016;**23**:261.  
725 doi:10.11604/pamj.2016.23.261.8414

726 38 Mwandira. Do Networks facilitate innovation, learning and sharing? Case studies  
727 from the Quality of Care Network (QCN) evaluation. One of the Quality of Care Network  
728 papers.

729 39 Akter K. Influences on policy-formulation, decision-making, organisation and  
730 management for maternal, newborn and child health in Bangladesh, Ethiopia, Malawi  
731 and Uganda: the roles and legitimacy of a multi-country network , one of the Quality of  
732 Care Network papers.

733 40 Shelton RC, Cooper BR, Stirman SW. The Sustainability of Evidence-Based  
734 Interventions and Practices in Public Health and Health Care. *Annual Review of Public*  
735 *Health* 2018;**39**:55–76. doi:10.1146/annurev-publhealth-040617-014731

736 41 Djellouli N. Effectiveness of a multi-country implementation-focused network:  
737 delivery of interventions, processes, and maternal, newborn and child health outcomes,  
738 one of the Quality of Care Network papers.

739 42 Iwelunmor J, Blackstone S, Veira D, et al. Toward the sustainability of health  
740 interventions implemented in sub-Saharan Africa: a systematic review and conceptual  
741 framework. *Implement Sci* 2016;**11**:43. doi:10.1186/s13012-016-0392-8

742 43 Sarriot E, Shaar AN. Community Ownership in Primary Health Care—Managing the  
743 Intangible. *Glob Health Sci Pract* 2020;**8**:327–31. doi:10.9745/GHSP-D-20-00427

744

745 Supplement materials

746 S1: Text. PLOS Global Public Health QCN Evaluation Collection 2-page summary.

747 S2: Text. PLOS Global Public Health QCN papers common methods section.

748 S3: Table. Data coding and analysis matrix

749

## Rebuttal letter

Vanessa Carels  
Staff Editor  
PLOS Global Public Health

Submission date: April 10, 2023

Dear Dr. Carels,

Thank you for inviting us to address reviewer's comments and submit a revised manuscript entitled: "Opportunities to sustain a multi-country quality of care network: lessons on the actions of four countries Bangladesh, Ethiopia, Malawi, and Uganda" We appreciate the time and effort you and the reviewer have dedicated to providing insightful feedback. Thus, it is with great pleasure that we resubmit our article for further consideration. We have incorporated the comments and indicated the revisions we made in the manuscript. We also attached the manuscript with track change as well as the cleaned version.

The following is point by point response to the comments and questions you sent us on March 09, 2023.

### Journal Requirements:

1. Please provide additional details regarding participant consent. In the ethics statement, please ensure that you have specified what type you obtained (for instance, written or verbal, and if verbal, how it was documented and witnessed). If your study included minors, state whether you obtained consent from parents or guardians. If the need for consent was waived by the ethics committee, please include this information."

**Response:** We have now addressed this issue in the Ethics session of the manuscript (Line number 208 & 210).

2. Please ensure that Funding Information and Financial Disclosure Statement are matched.

**Response:** yes, the funding information and financial disclosure statement are the same.

**Edits from our side:** we did some edits specifically on the naming of our sources of excerpts. In the earlier version we used short names now clearly wrote full names and replaced organization names by 'partner or government'. We have indicated those changes with track change.

Reviewer #1:

1. Why were there variations in the data collection dates and the number of times data was collected for the different countries?

**Response:** Thank you for pointing this out, the study in each country received ethical approval from local institution review board at different times which created different starting dates for each country. In addition, the data collection dates and the number of times data was collected was further impacted by local COVID 19 restrictions.

2. there should be an explanation. What is the rationale behind the number of participants interviewed or the number of transcripts analyzed in the member countries.

**Response:** The main goal of participant selection was to identify key informants with the depth of information needed to answer our research questions. The final number of participants interviewed was based on the saturation level of information we were getting from the participants. We have now included a sentence describing this in the method section, line number 155 and 173-175.

3. The 1st sustainability action states "At the global level, between countries, respondents recalled the importance of holding repeat, joint international meetings with global partners" but according to table 2 of the methods supplement, global meeting minutes were not reviewed, is this because they don't exist or is there another specific reason? In Uganda also no minutes were reviewed, why?

**Response:** The QCN evaluation group had access to multiple potential sources of data and care was taken to identify the best sources to answer specific research questions. As such, for the purpose of this paper, it was decided that we use the wealth of information that we collected through the qualitative interviews and nonparticipant observations.

4. There were no observations made at local/district level meetings, would it not have been critical to this study to undertake those observations at the implementation level?

**Response:** It is true that such observations could have been a beneficial additional data collection point and we have addressed this in the limitation section line number (601-05).

5. Regarding sustainability action 3, It says all four countries employed various mechanisms but then only discusses one i.e small grants for health facilities what are the other types of motivating factors used and were such incentives applied in all countries, is there a quote to support that? this makes one skeptical about the all green scoring in table four for this particular theme, wouldn't you say?

**Response:** As described in that section, giving small grants as an incentive was one of the methods widely employed in three countries. The other method of motivation was

the training and skill transfer opportunity that was described in line 358-59. We have now added an excerpt to support our assessment (line 360-67).

6. There were missed opportunities to ask WHY and go deeper into understanding the root causes of such findings.

**Response:** Despite our efforts to reach saturation, we agree there might be places where we could have gone deeper: this is almost always possible with qualitative methods. Nonetheless, we believe that the rich data we gathered revealed important insights. This is a multi-country study, that involved several study sites within each country, and there is a limit to how much detail can be included. However, we did show the commonalities as well as differences pertaining to the sustainability actions across countries in our analysis.

7. How do the findings inform future program design and possibly evaluation, for instance seeing that Learning is an essential pillar of the LALA framework but this study indicated that some countries were doing good in one category and others in other categories, why did they fail to learn from one another?

**Response:** We are actively engaged in discussions with global and national actors to make sure that these findings have the opportunity to inform decisions. Recently there was a global meeting in Ghana (March 14-16), and the results were presented for the global audience and the research team were engaged in a fruitful dialogue during the event. Regarding the learning between countries and within, a deeper analysis was made by the research team and submitted for publication (paper two and three).

8. With the exception of Ethiopia, all countries had at least three rounds of interviews, were there any changes in the responded across time, how is that reflected in this study?

**Response:** We didn't fully understand this question; if it is about changes to the respondents over time, at each round we went to the same facilities and engaged the same staff but we also interviewed new people where staff changes meant that new key informants could be identified. Similarly, at the national level, we identified the main QCN actors and followed-up with them in subsequent rounds, as well as any new important national actors that had joined the network in the meantime. In our analysis, we used data from all rounds, including in Ethiopia where we had two iterative rounds of data collection and as a result were able to see how things changed over time.

Again, thank you for the detailed and valuable comment. I hope this revision satisfactorily address all the concerns you and the reviewer have raised.

Sincerely,  
Seblewengel Lemma  
Corresponding Author  
London School of Hygiene and Tropical Medicine  
[Seblewengel.abreham@lshtm.ac.uk](mailto:Seblewengel.abreham@lshtm.ac.uk)
